# Supplementary figures and images for: DnaJC7 specifically regulates tau seeding
Source: eLife journal article supplement (doi:10.7554/elife.86936), 2023-06-30

**$\alpha$ -DNAJC7**

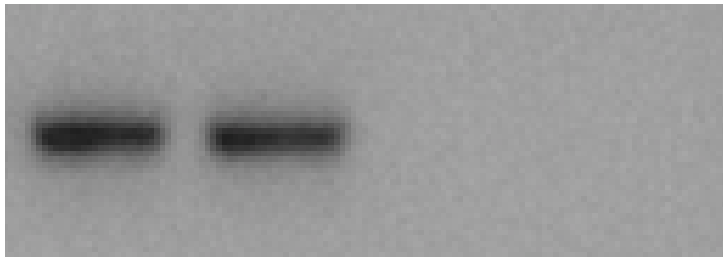

**Rep1   Rep2**

**Rep1   Rep2**

**Non-Target**

**$\Delta$ DNAJC7**

Supplement: supp [file elife-86936-supp-v1.zip]

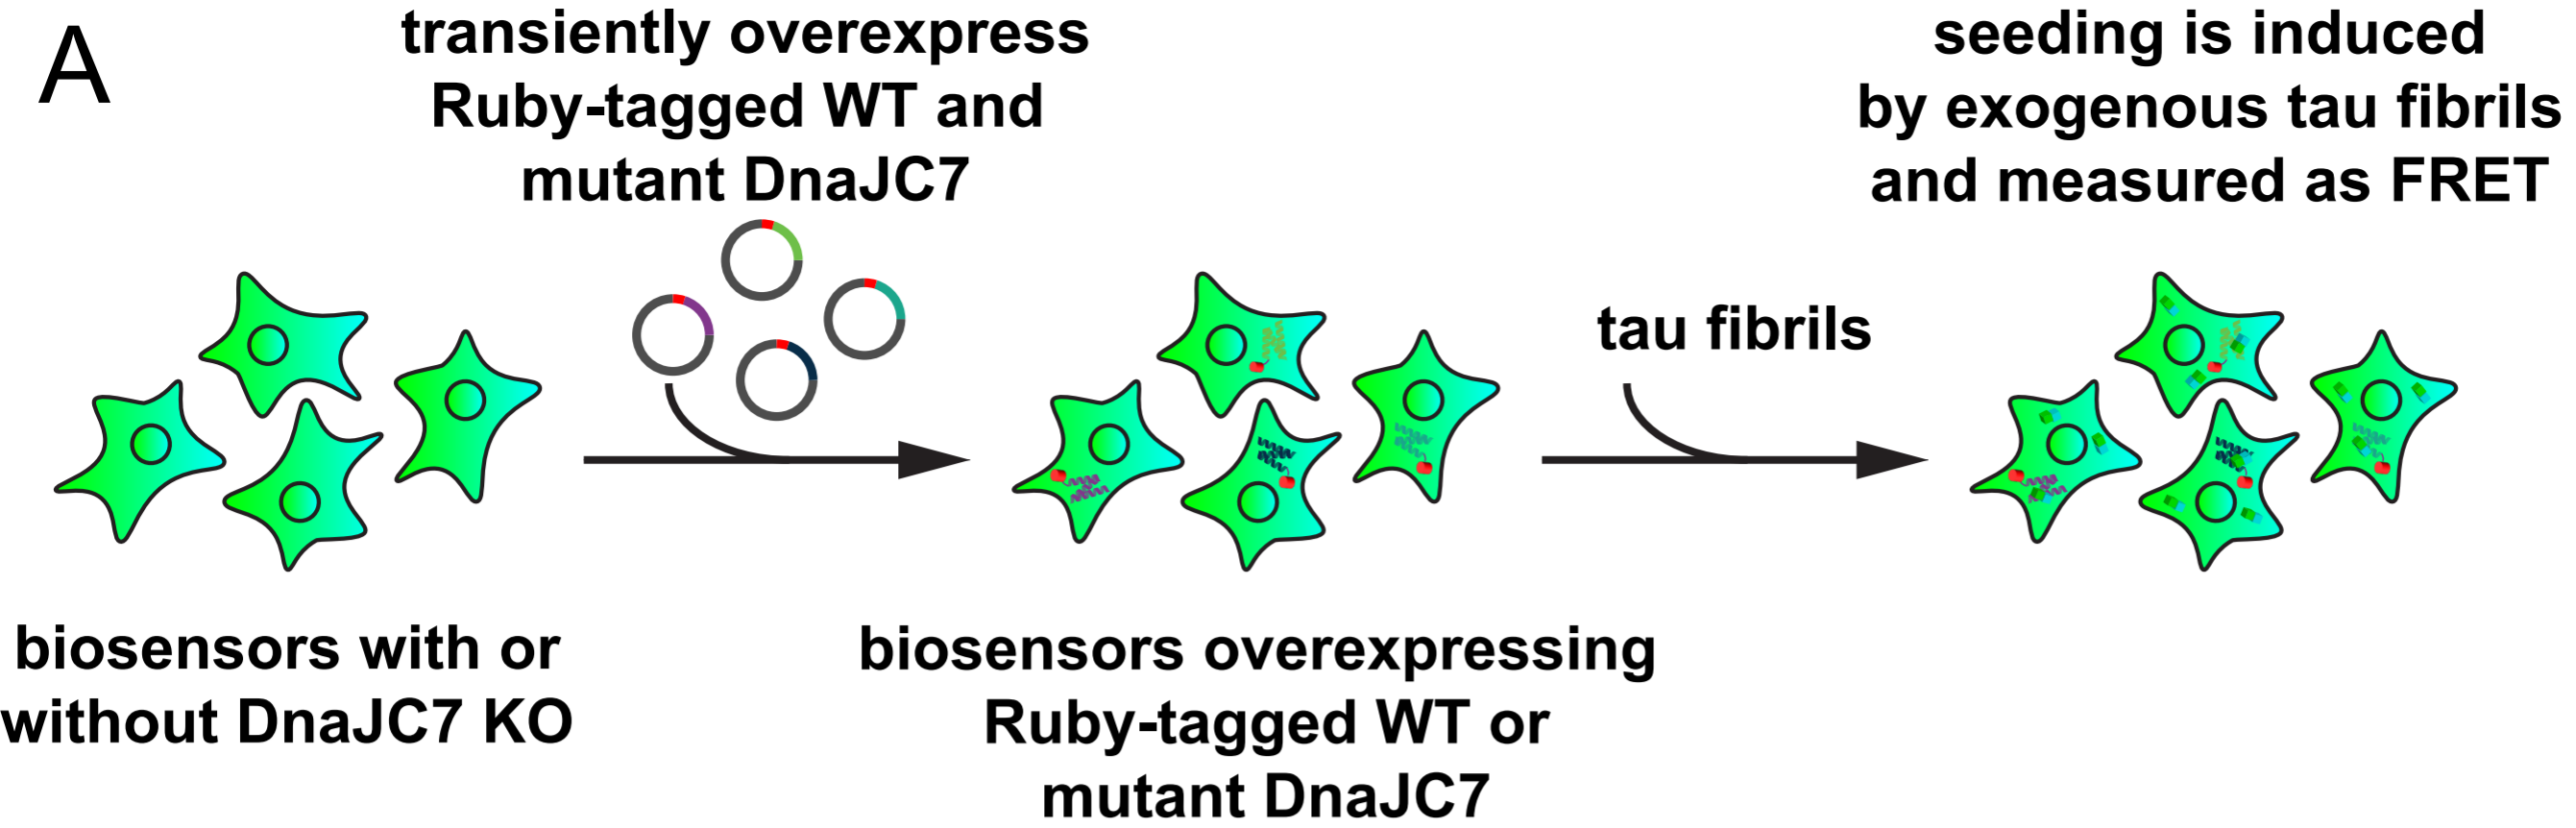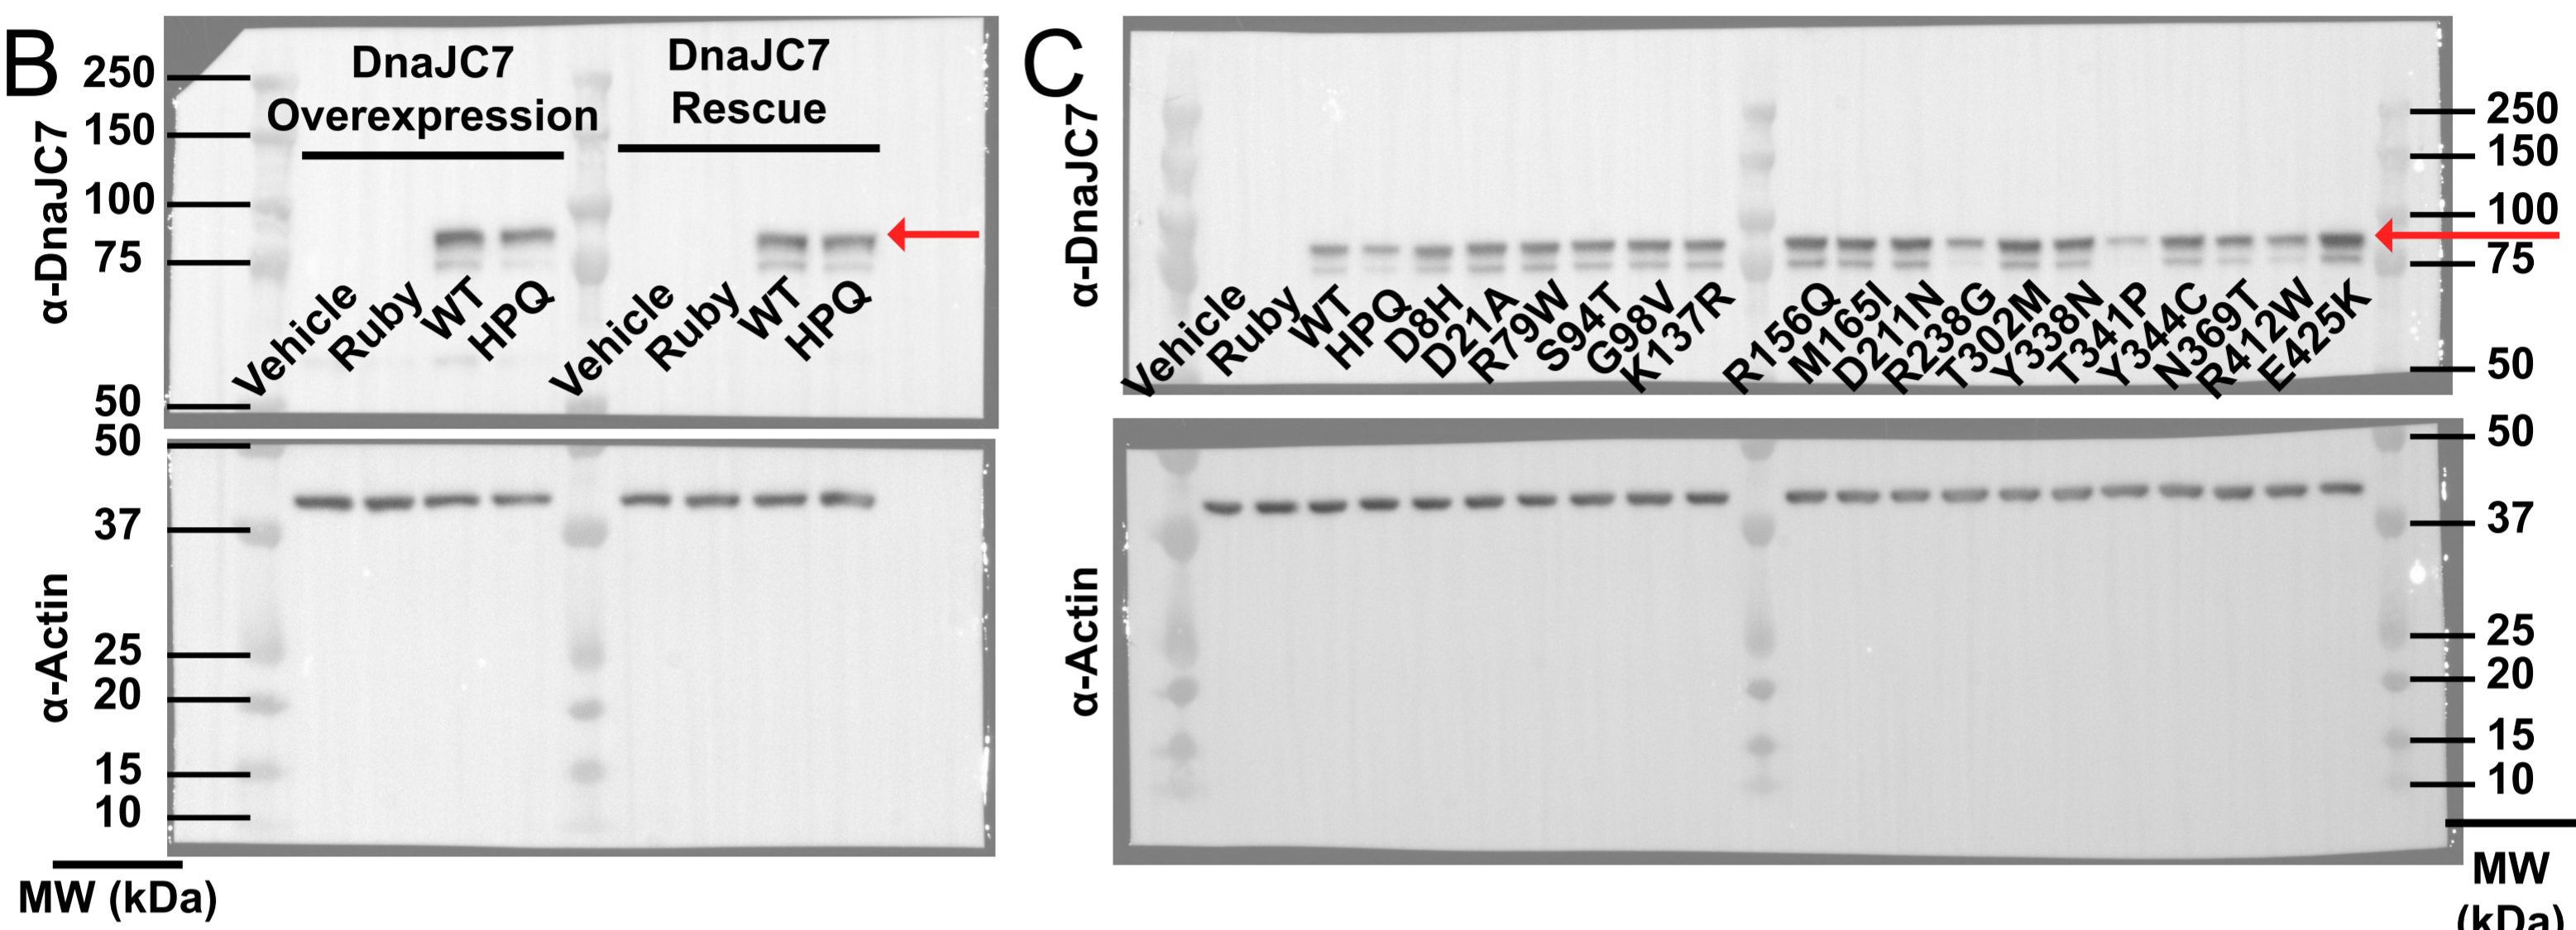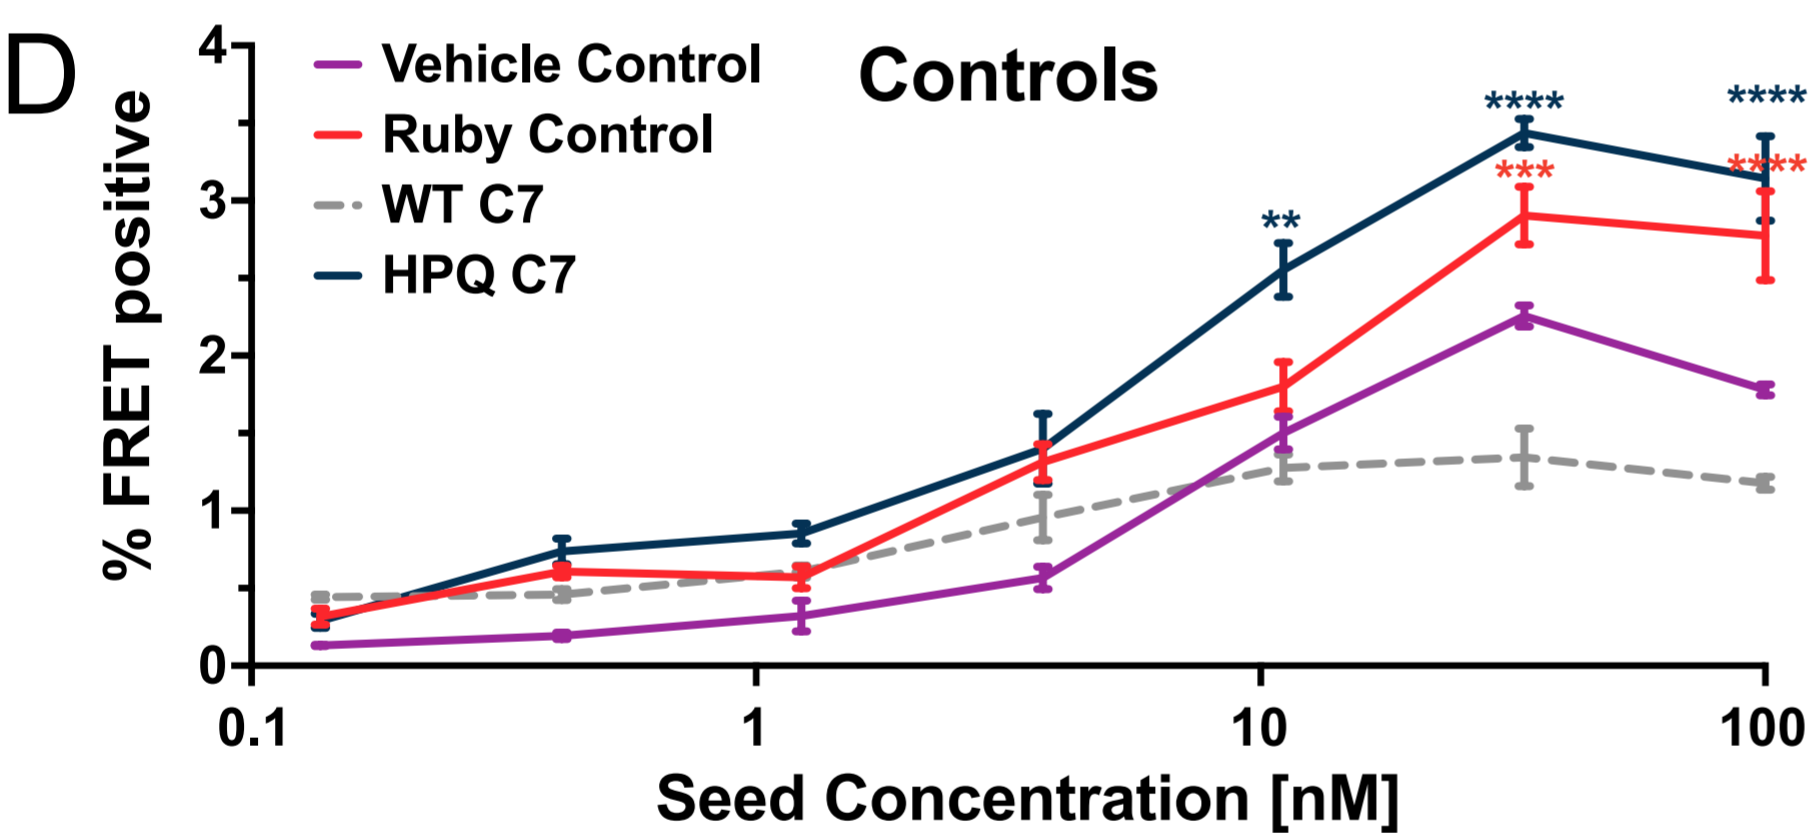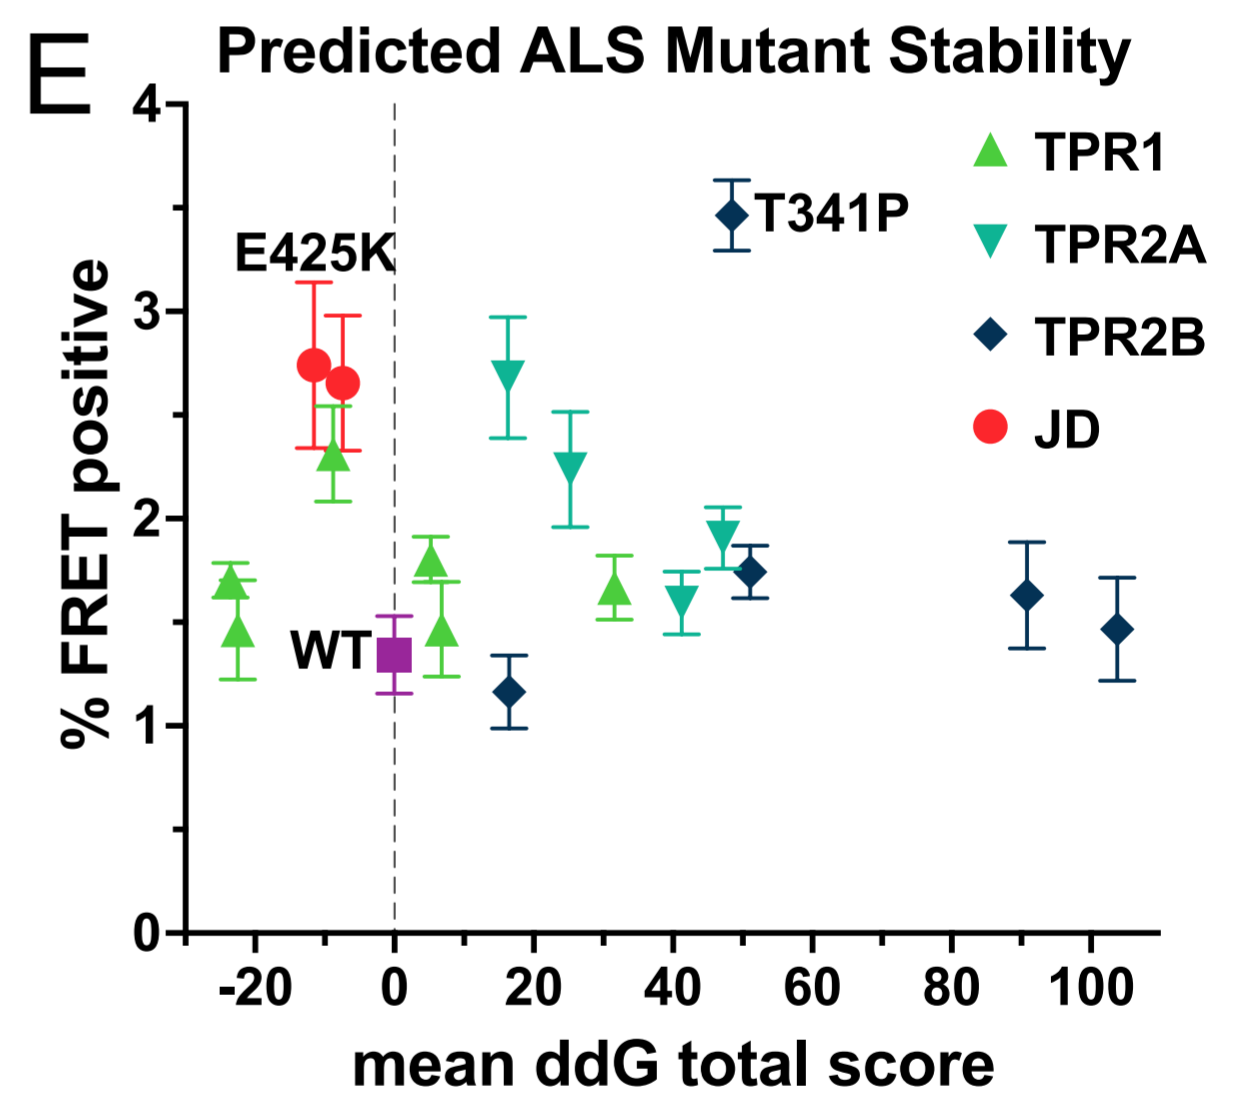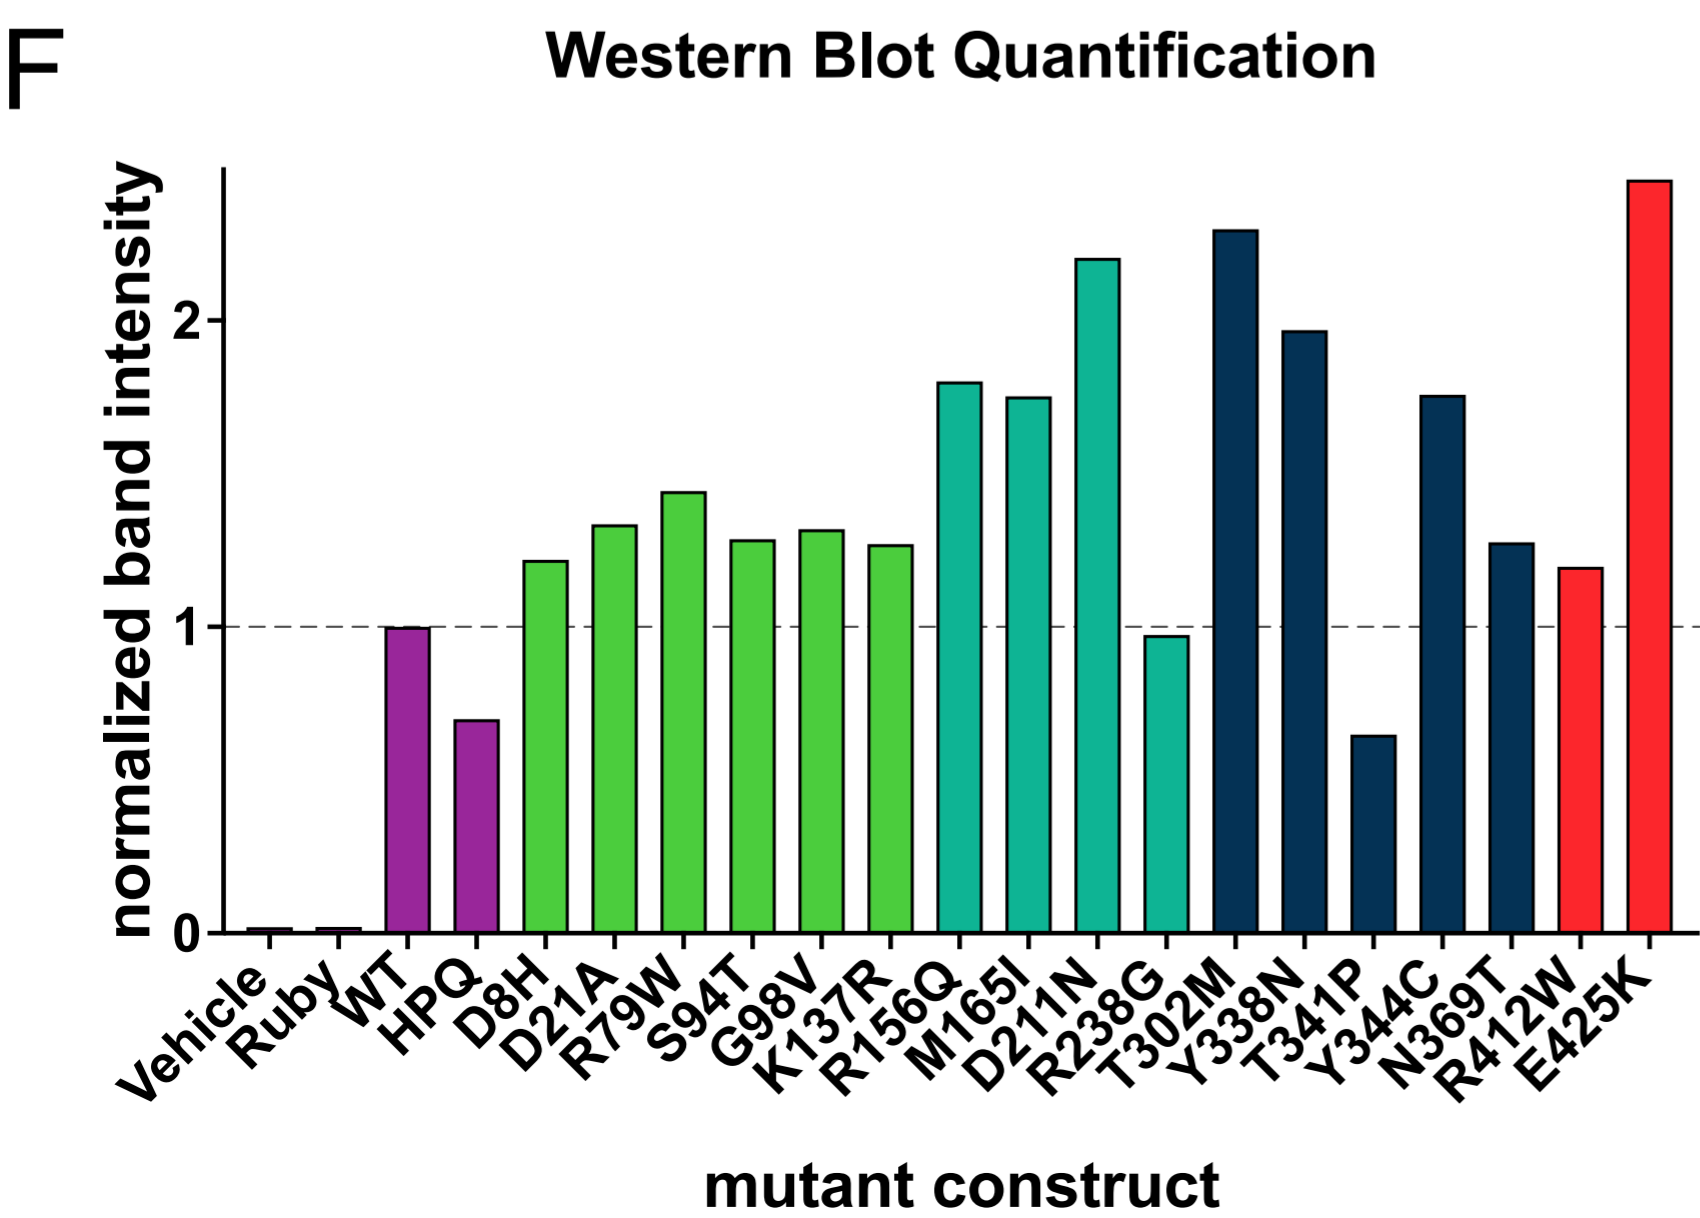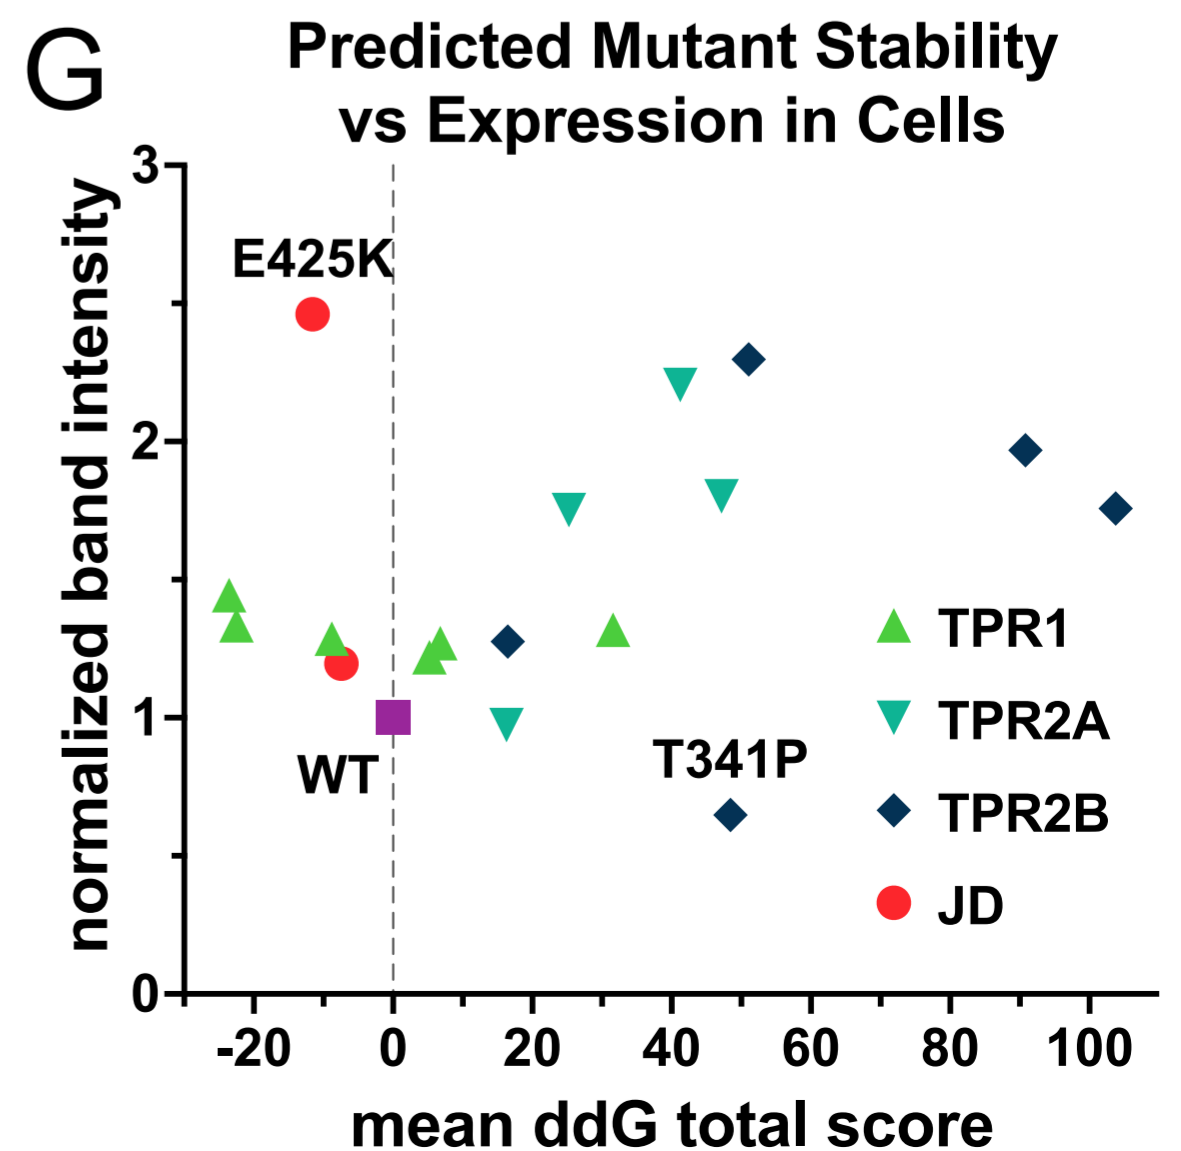

Supplement: supp [file elife-86936-supp-v1.zip]

$\alpha$ -DnaJC7

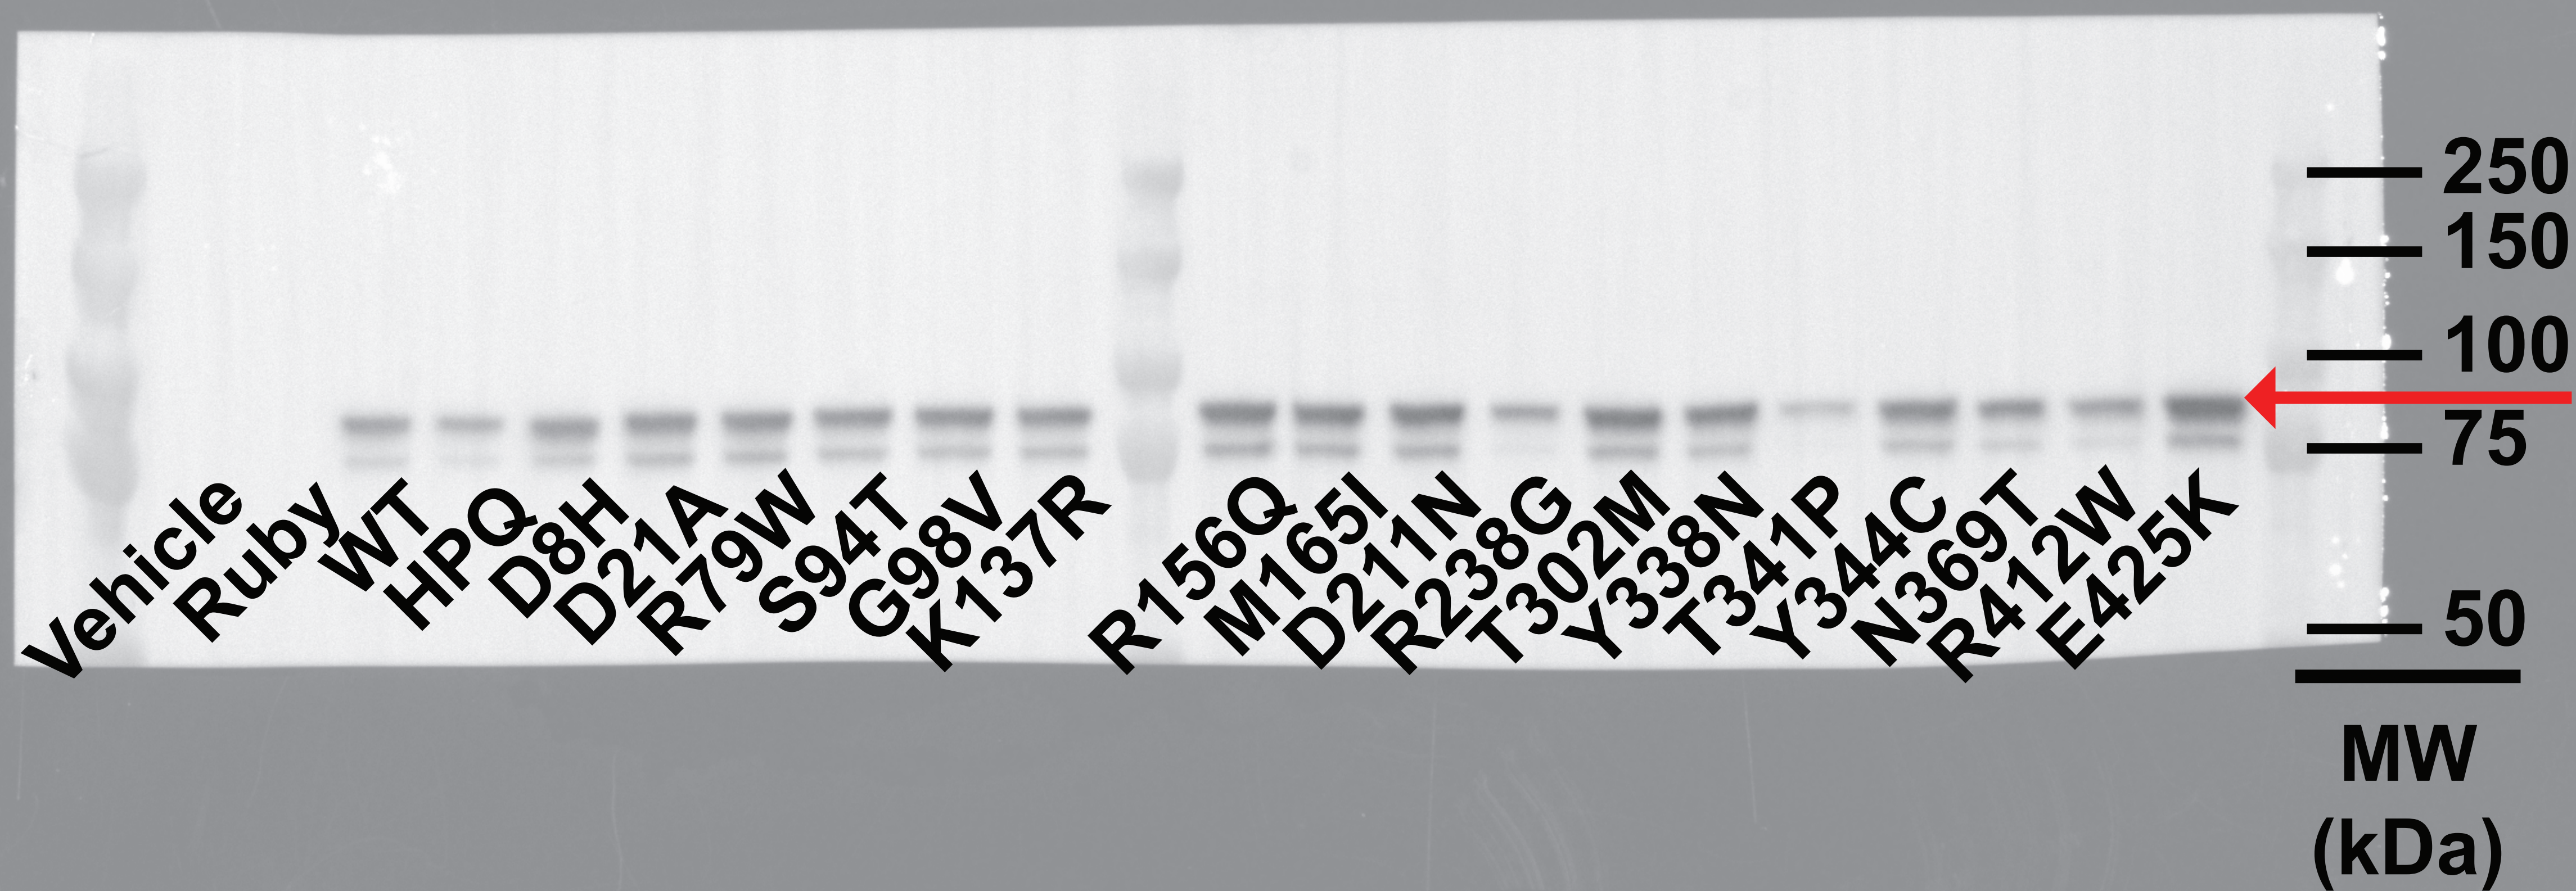

Supplement: supp [file elife-86936-supp-v1.zip]

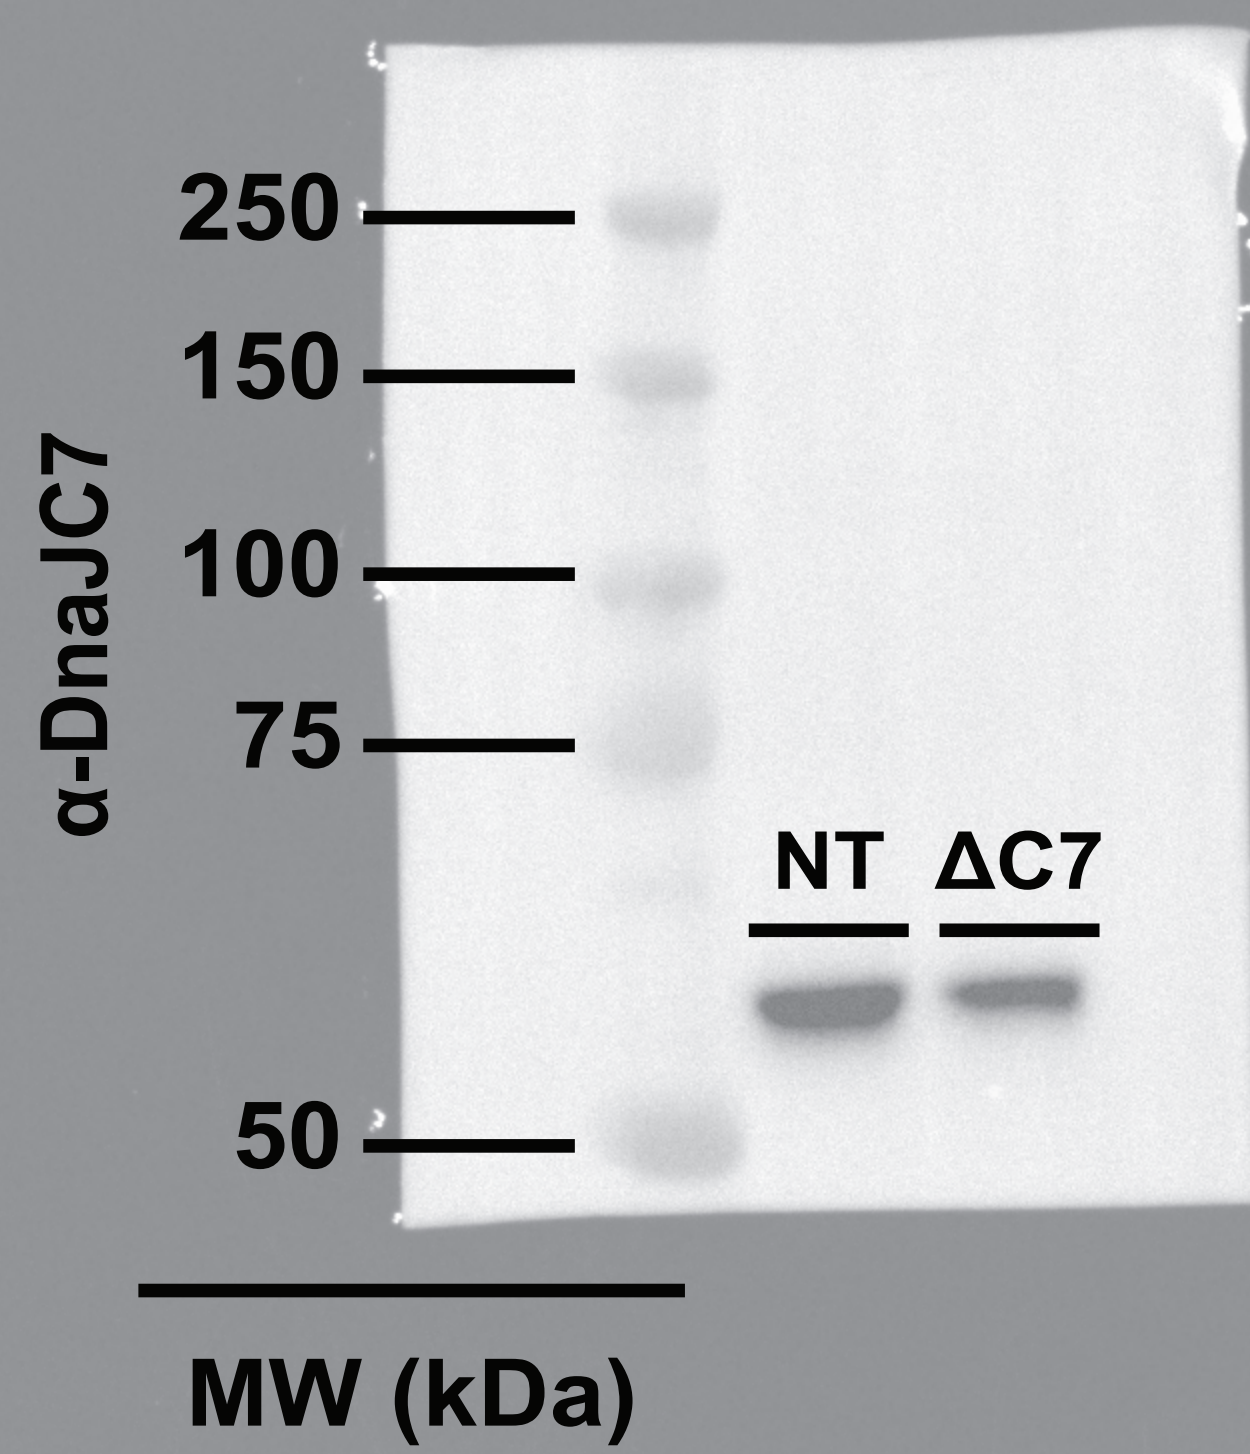

Supplement: supp [file elife-86936-supp-v1.zip]

## Supernatant Fraction

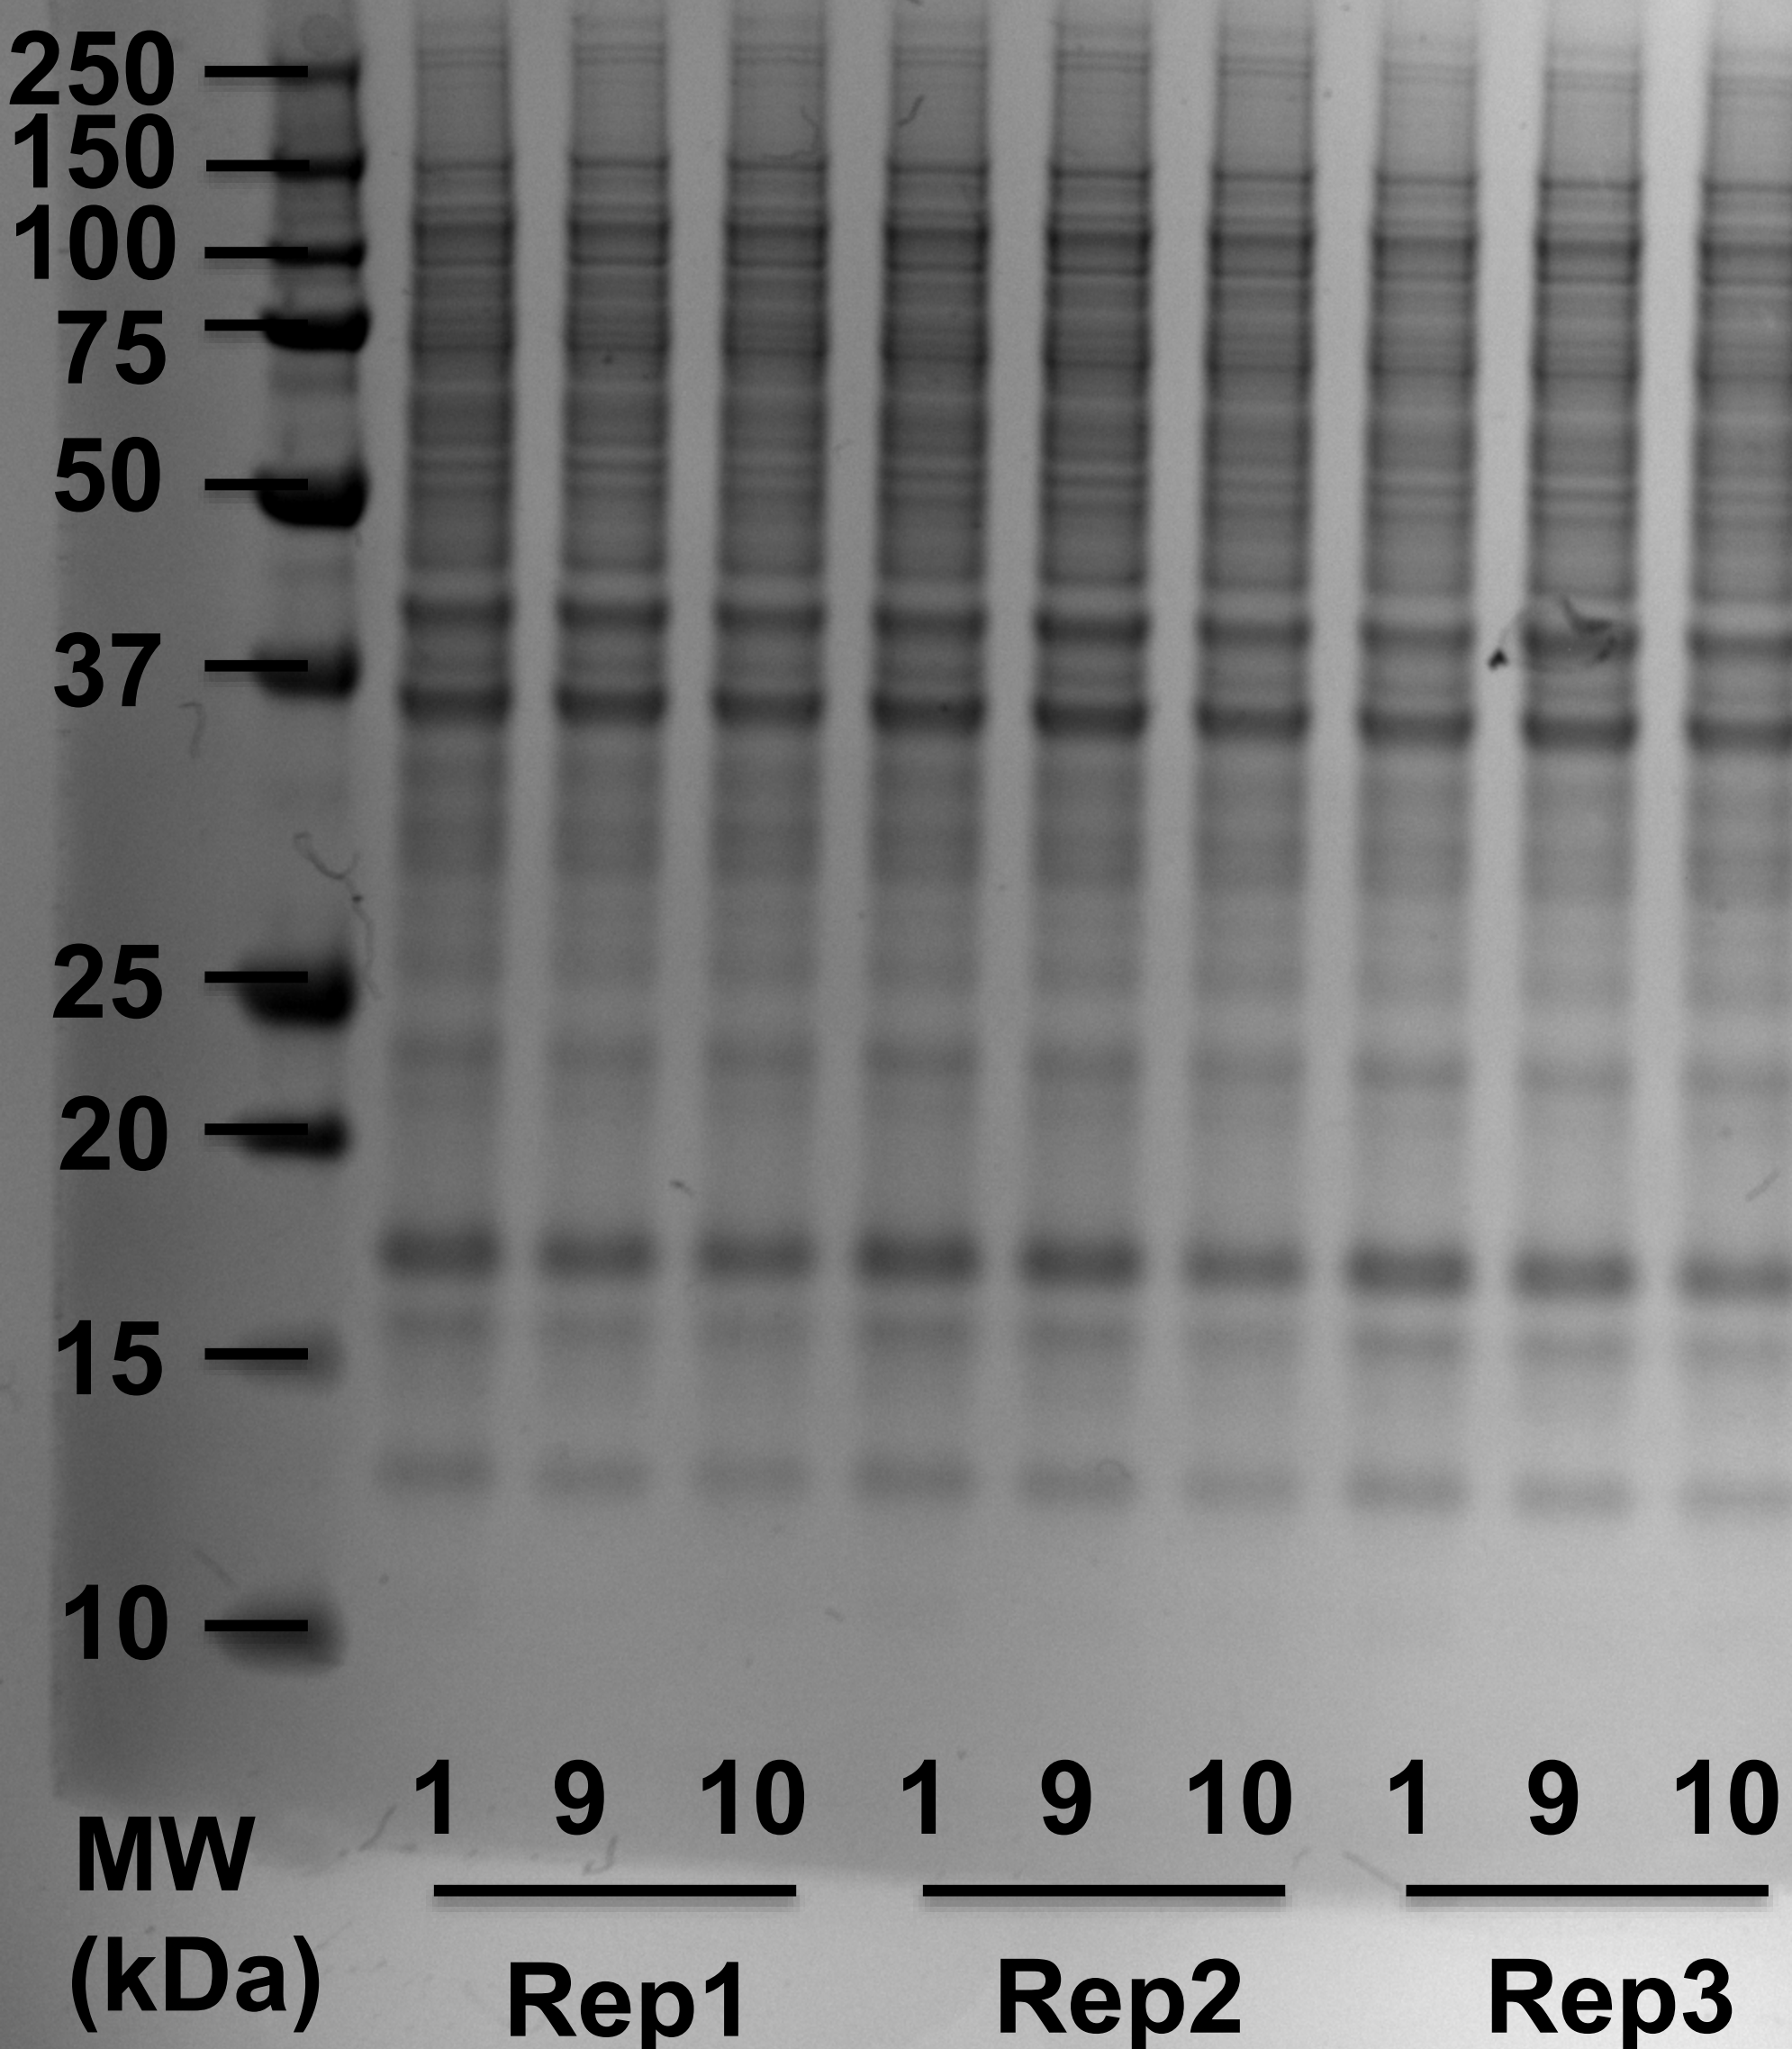

## Pellet Fraction

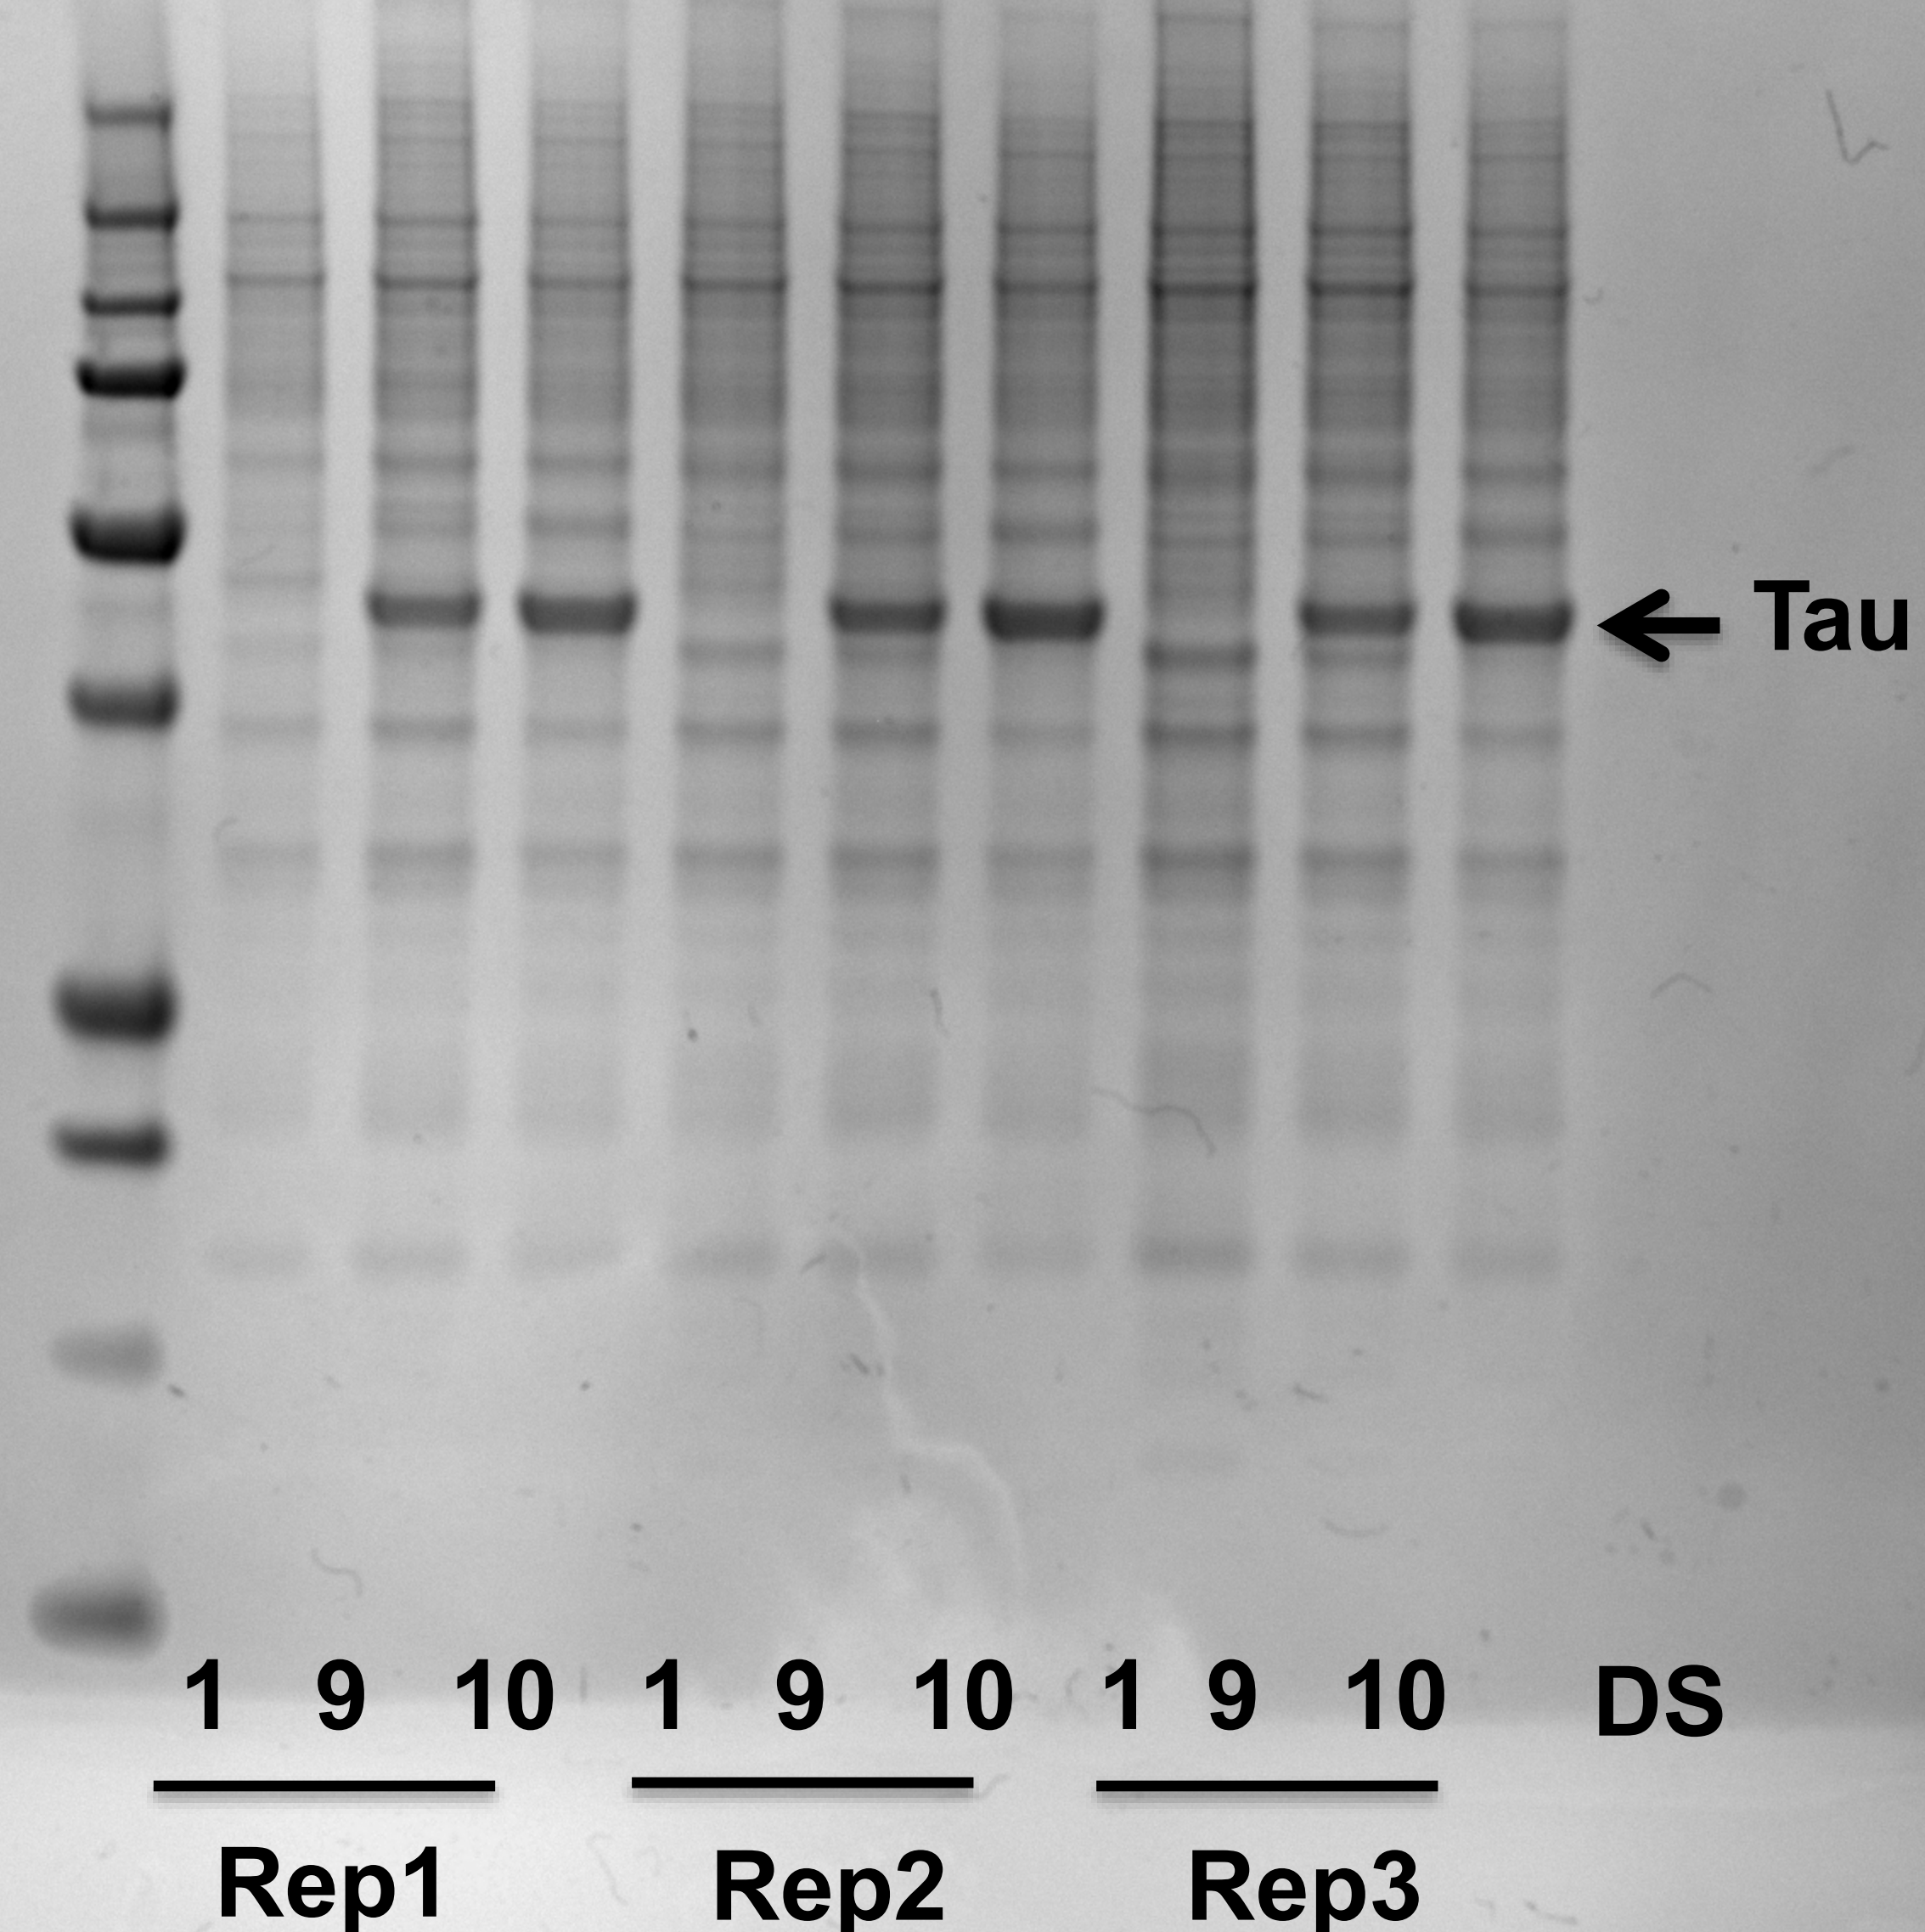

Mass Spec Analysis (Whole Lane)

Supplement: supp [file elife-86936-supp-v1.zip]

$\alpha$ -Actin

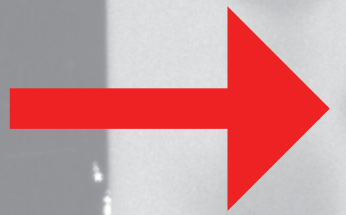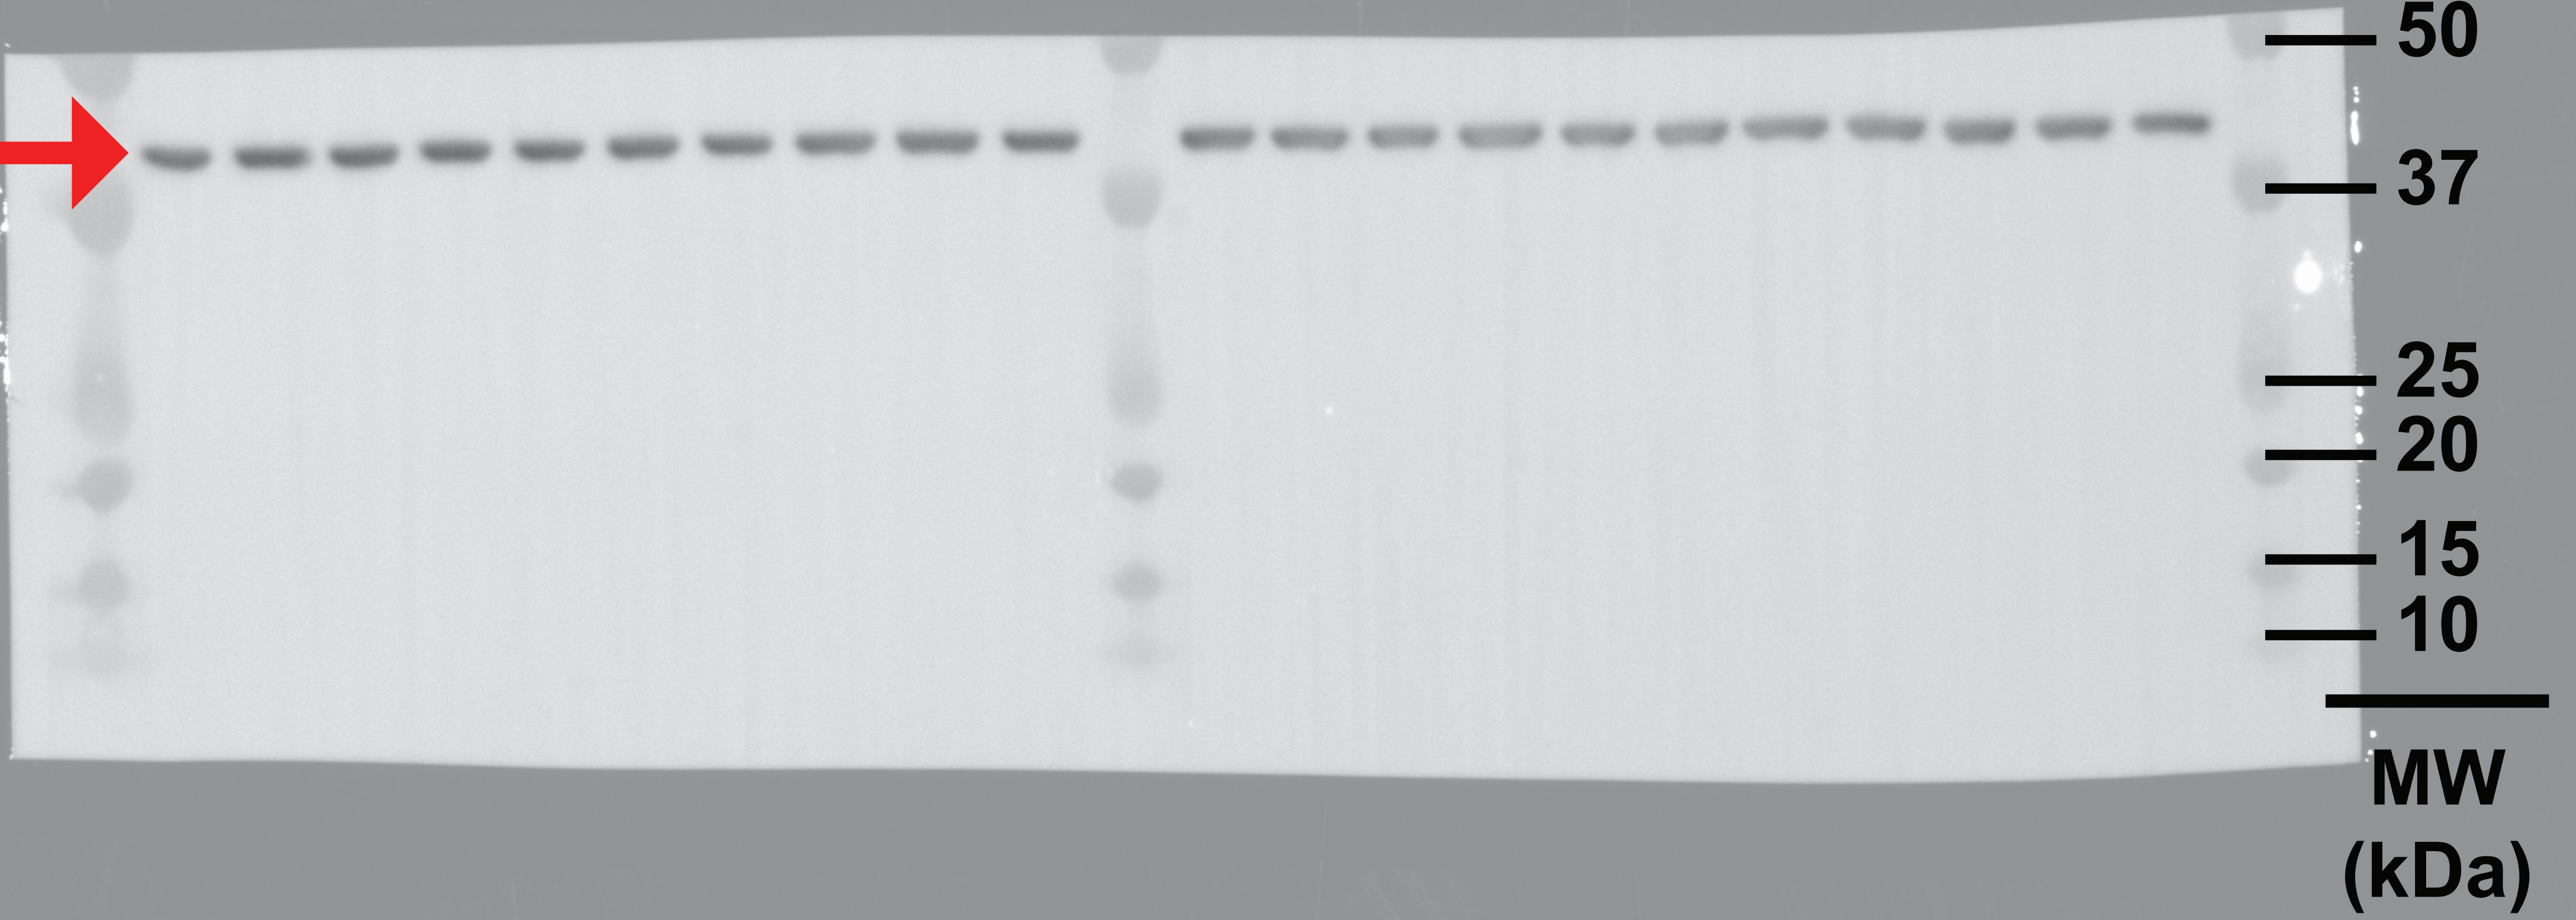

Supplement: supp [file elife-86936-supp-v1.zip]

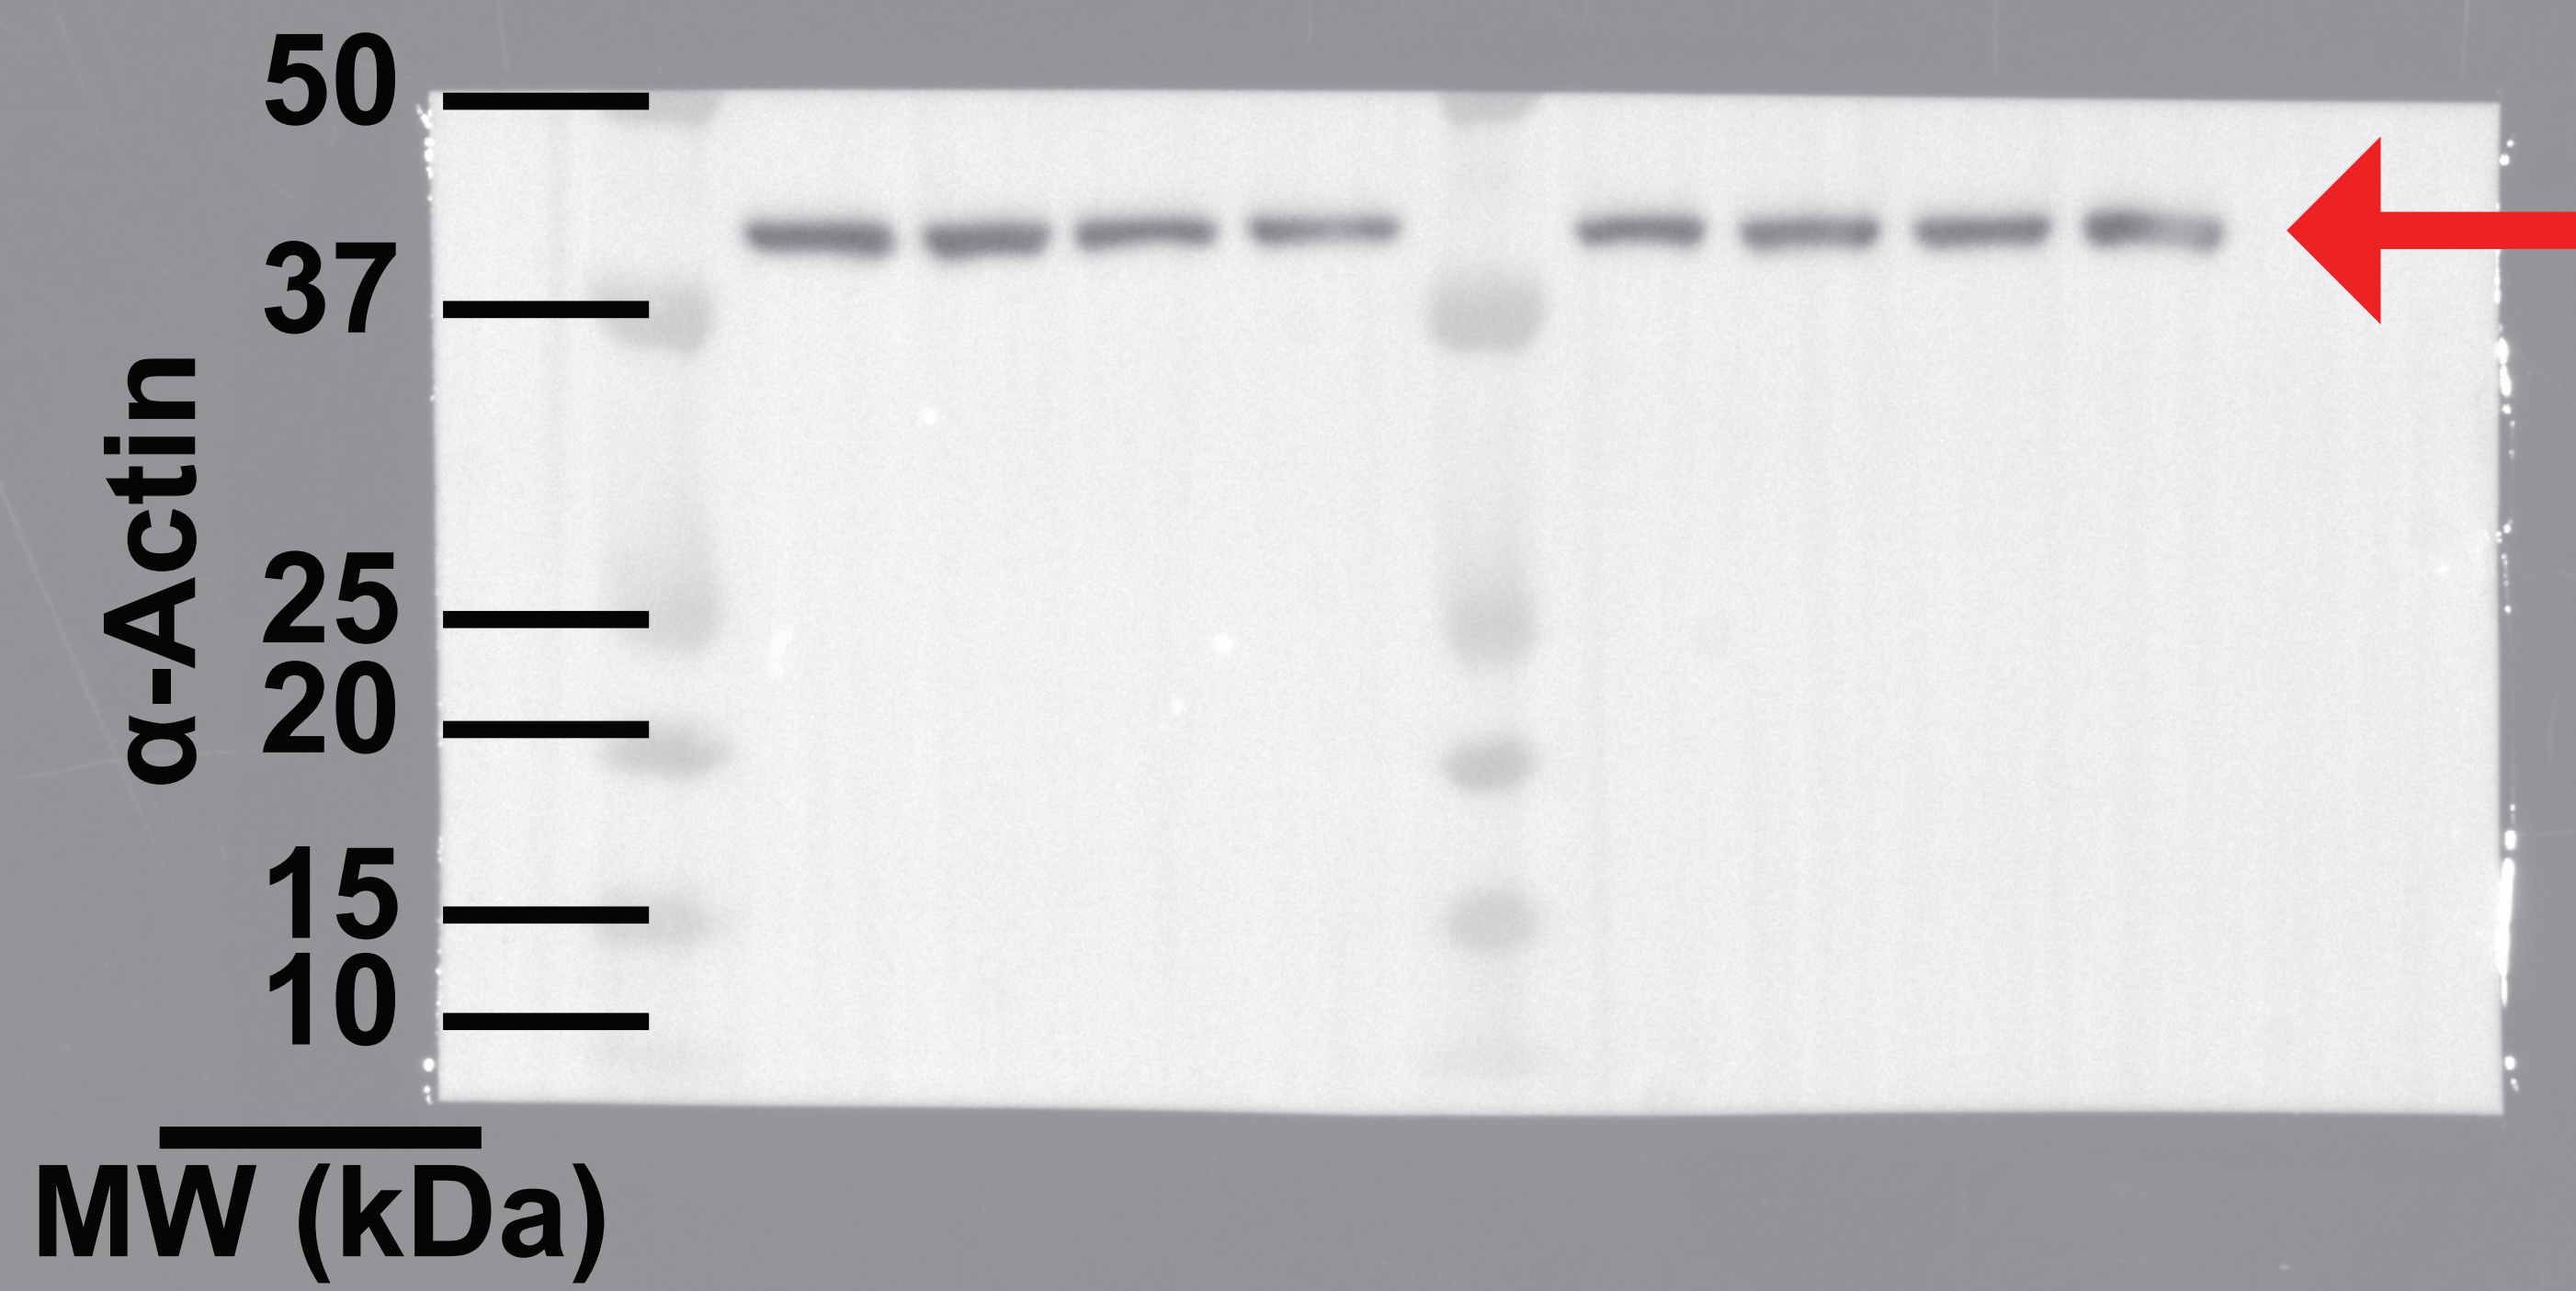

Supplement: supp [file elife-86936-supp-v1.zip]

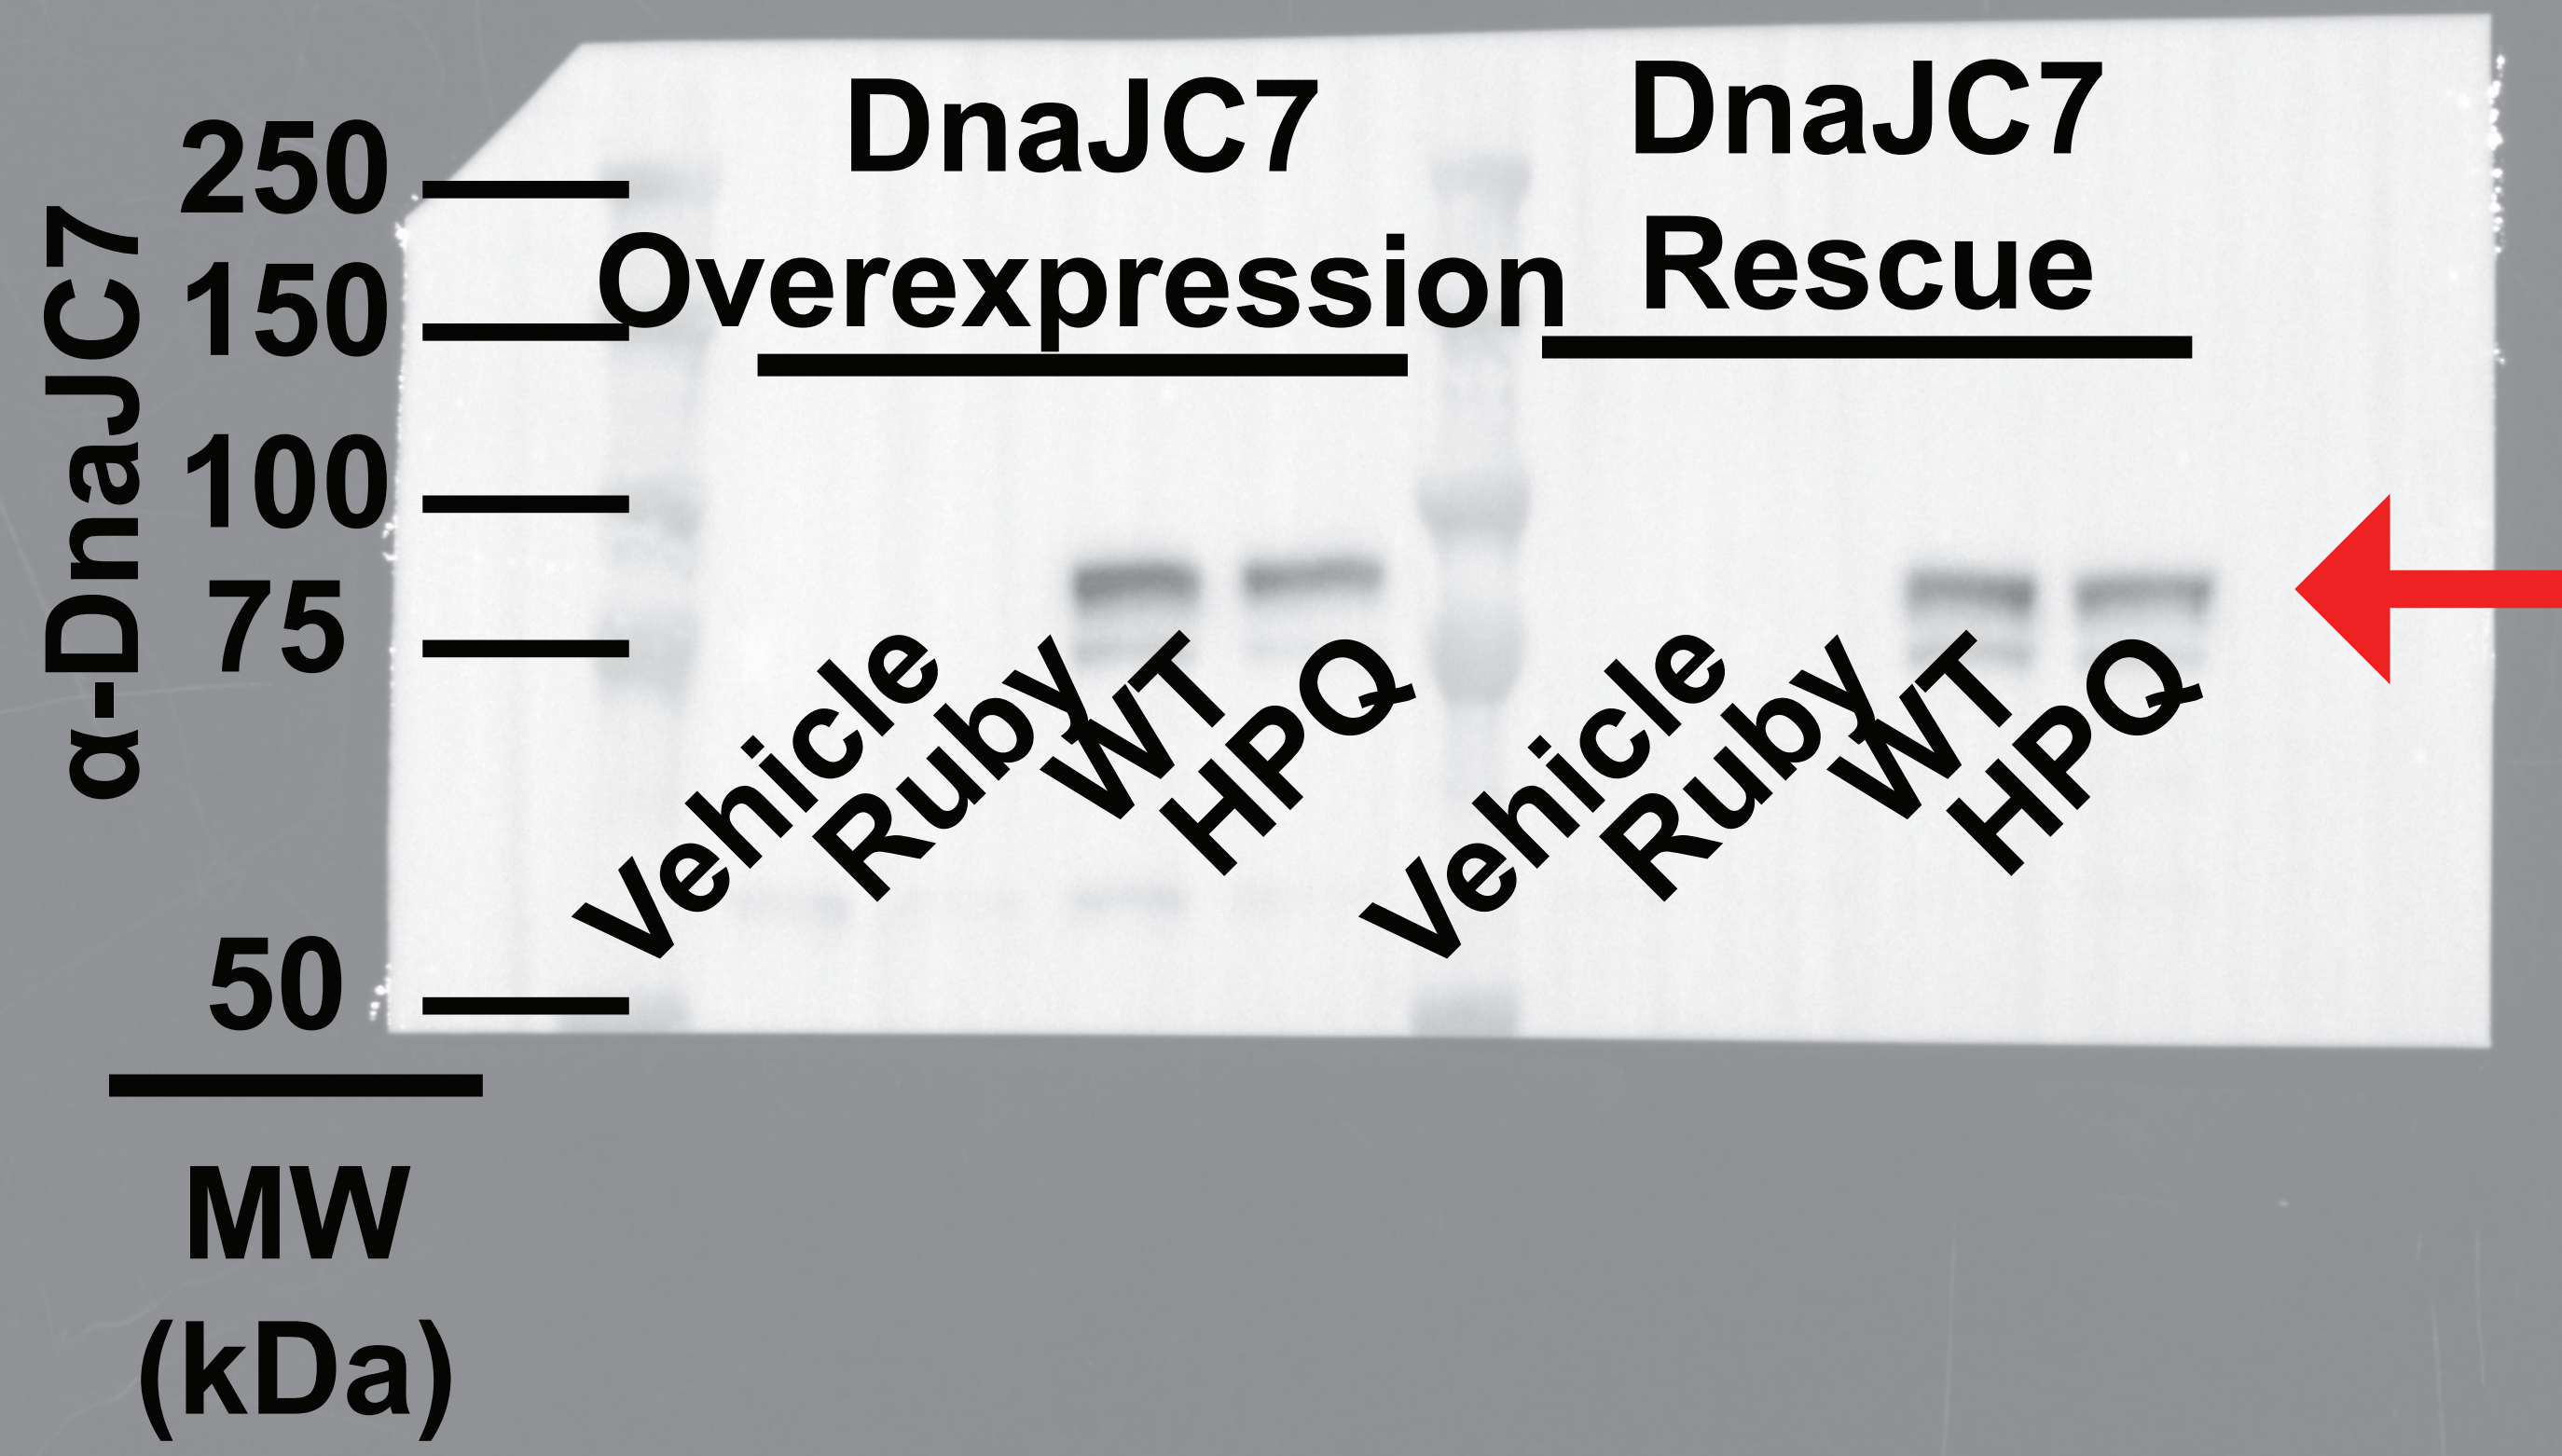

Supplement: supp [file elife-86936-supp-v1.zip]

A

Group 1

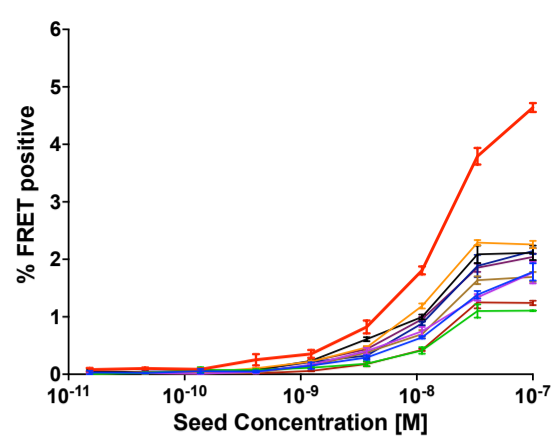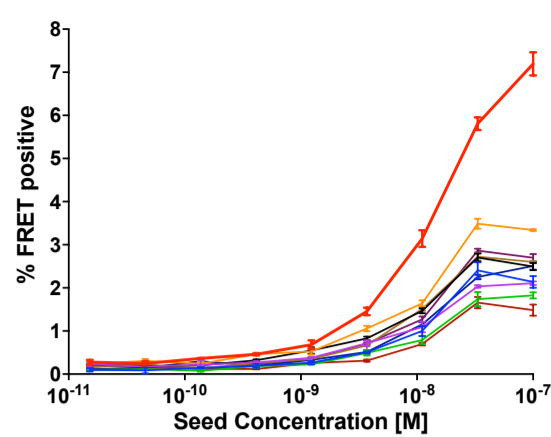

Group 2

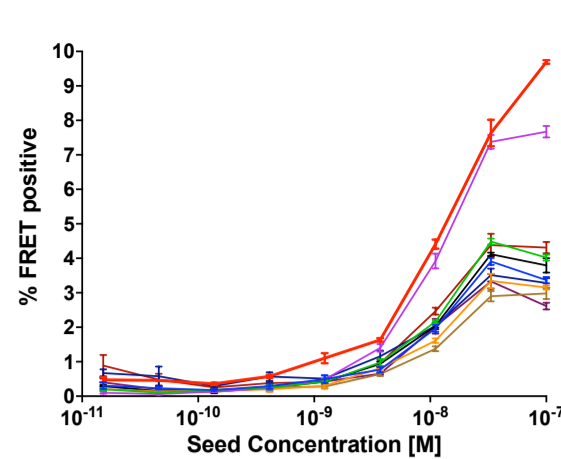

Group 2 R2

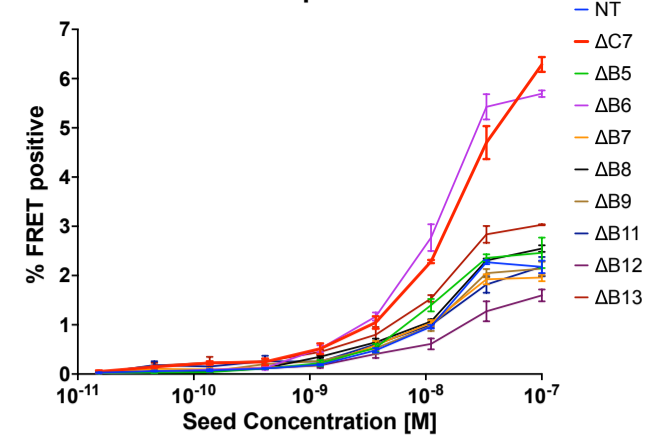

Group 3

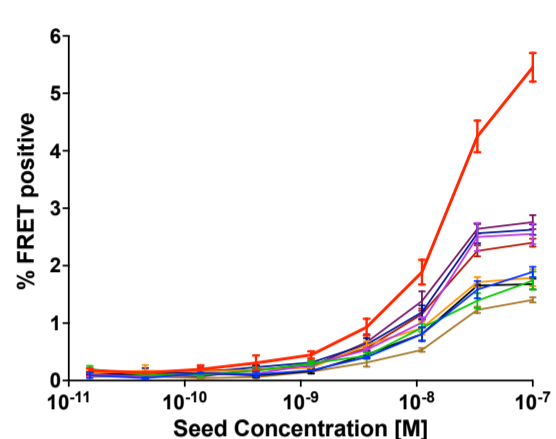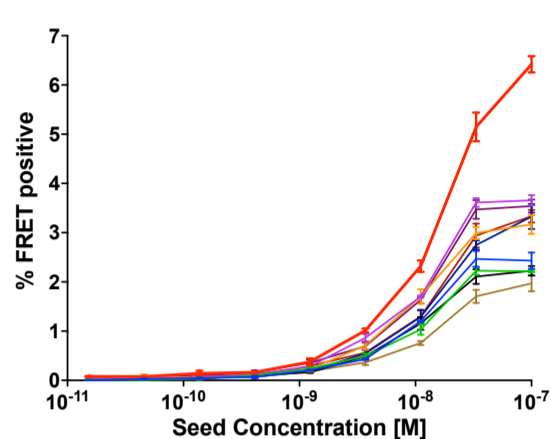

Group 4

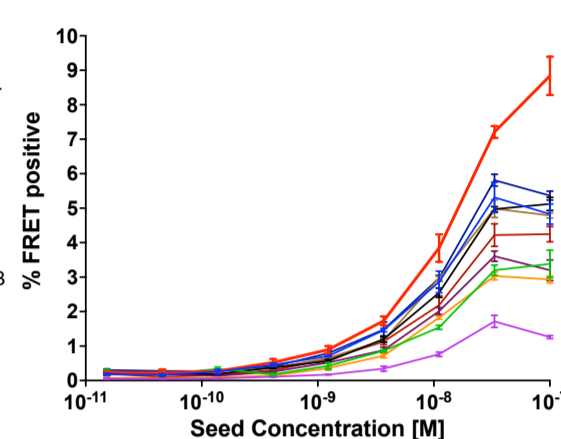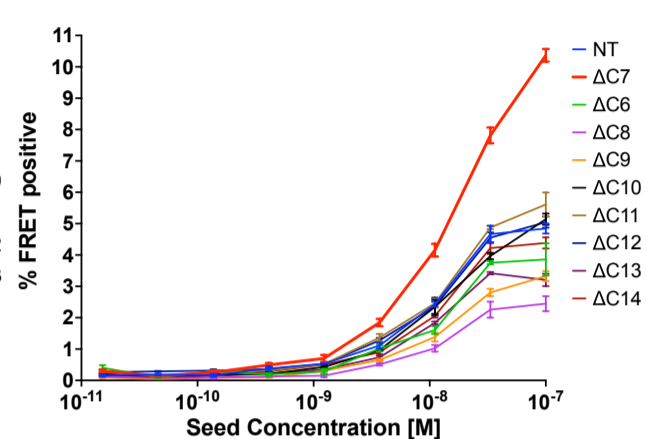

Group 5

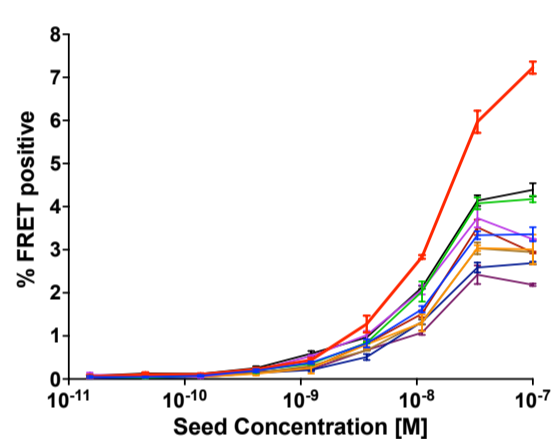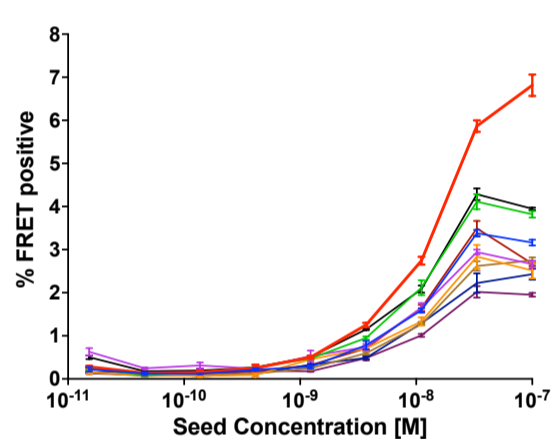

Group 6

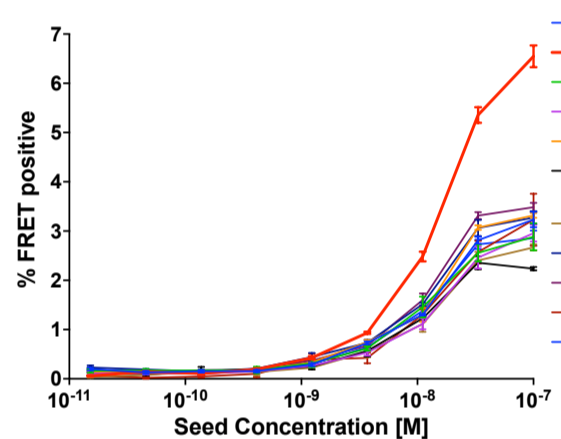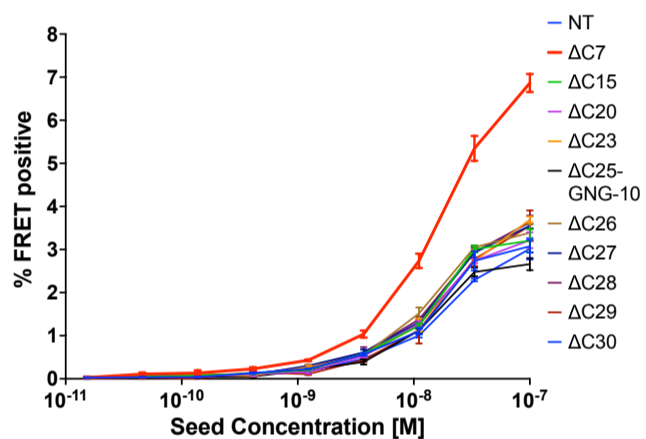

B

6 Hour Harvest

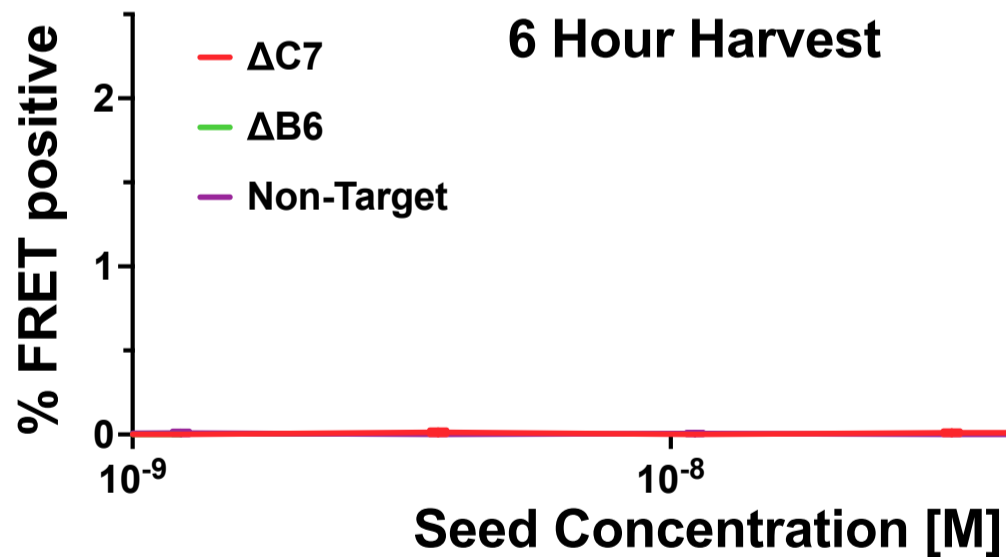

12 Hour Harvest

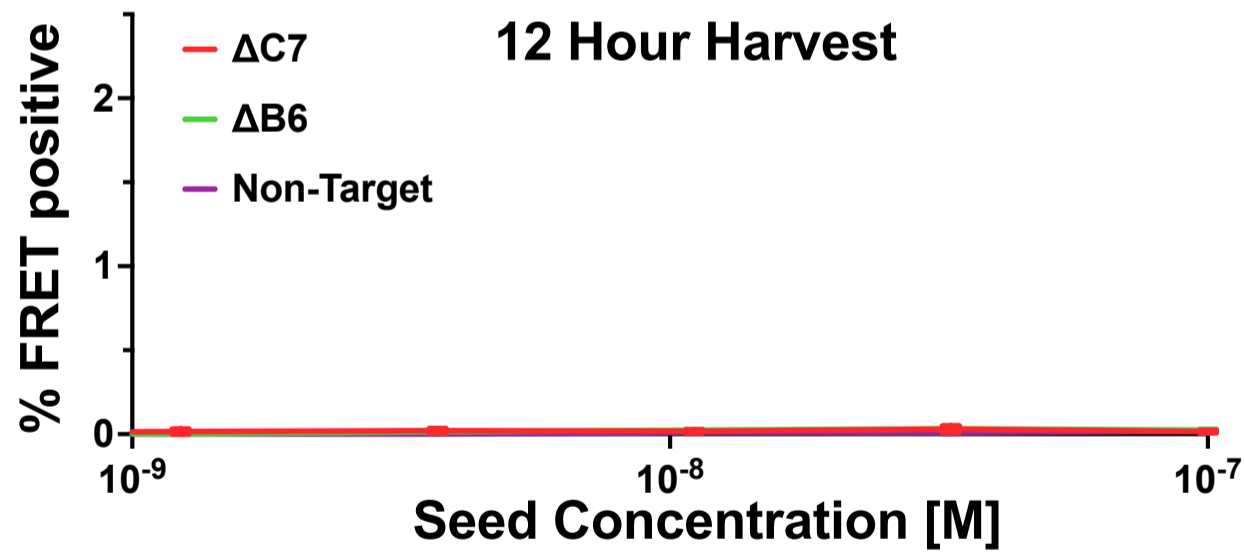

C

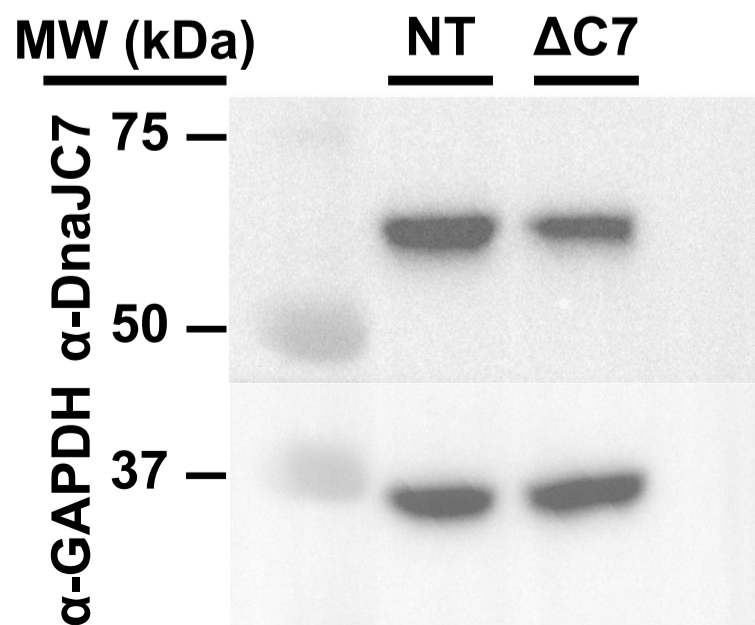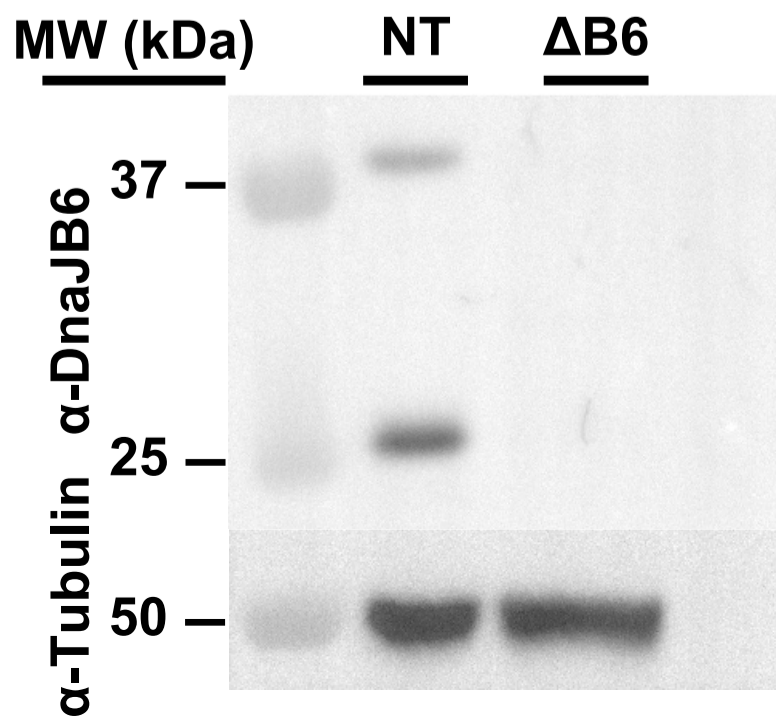

Supplement: supp [file elife-86936-supp-v1.zip]

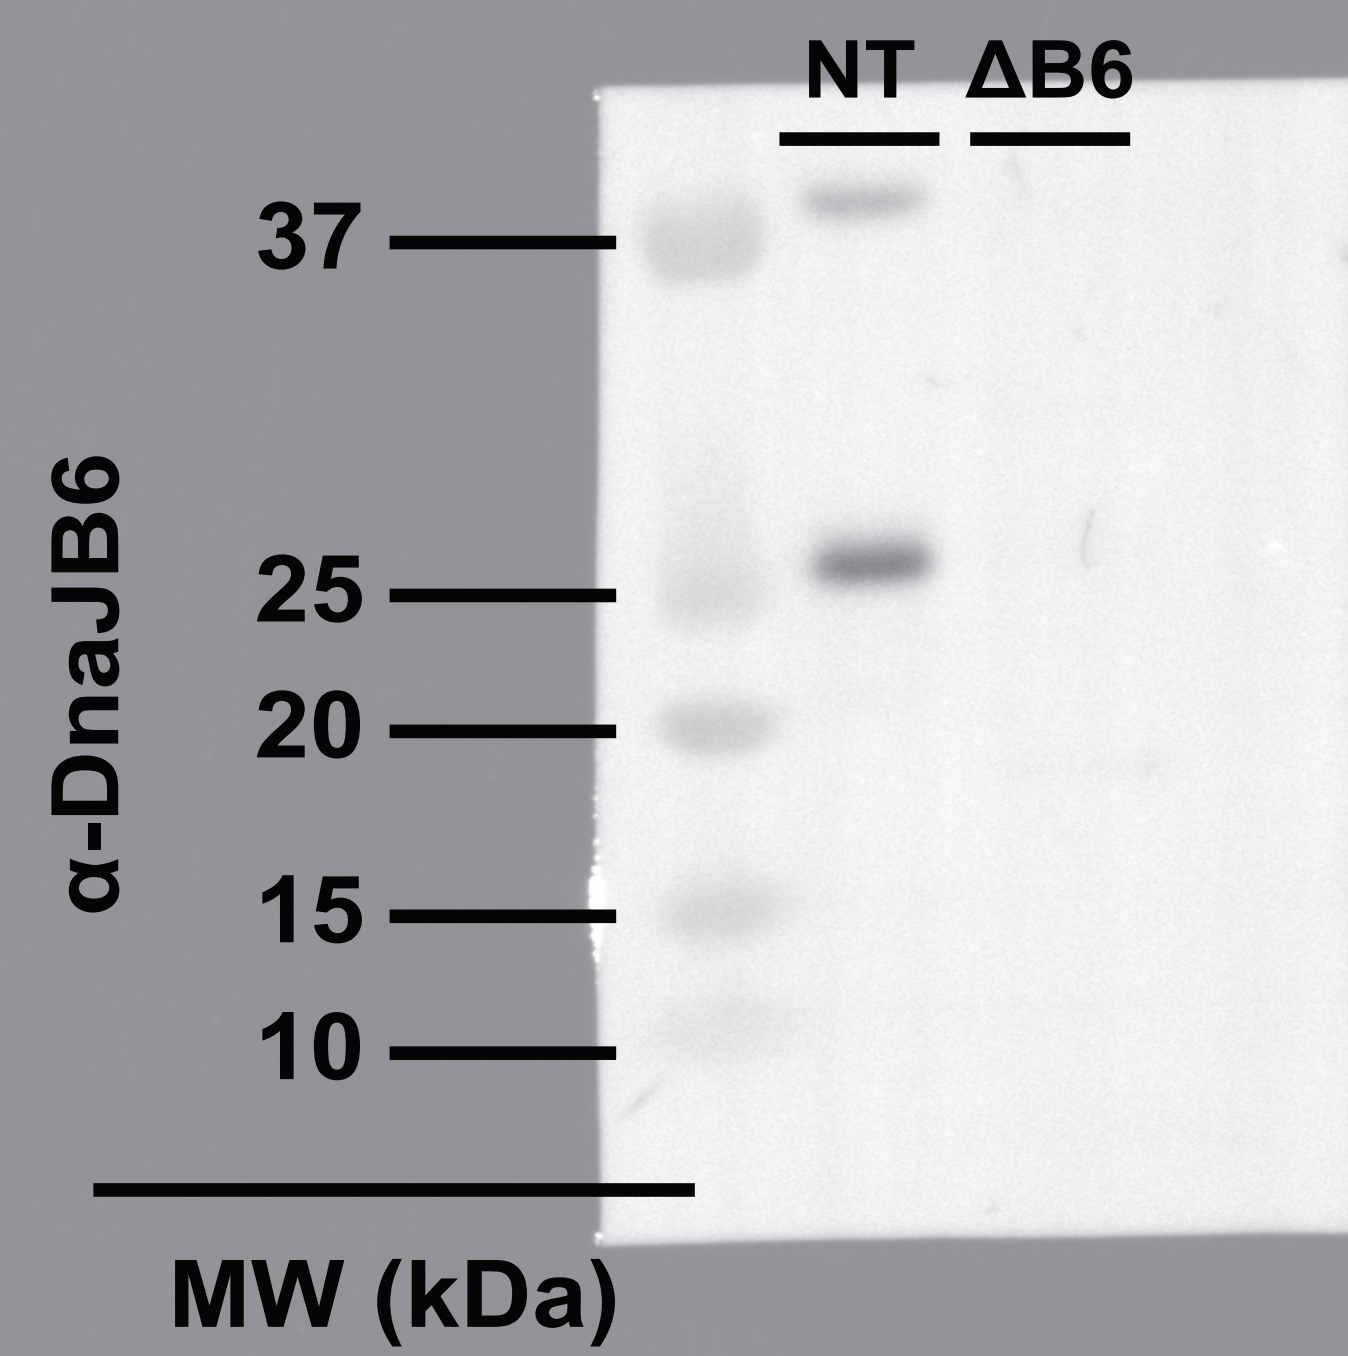

Supplement: supp [file elife-86936-supp-v1.zip]

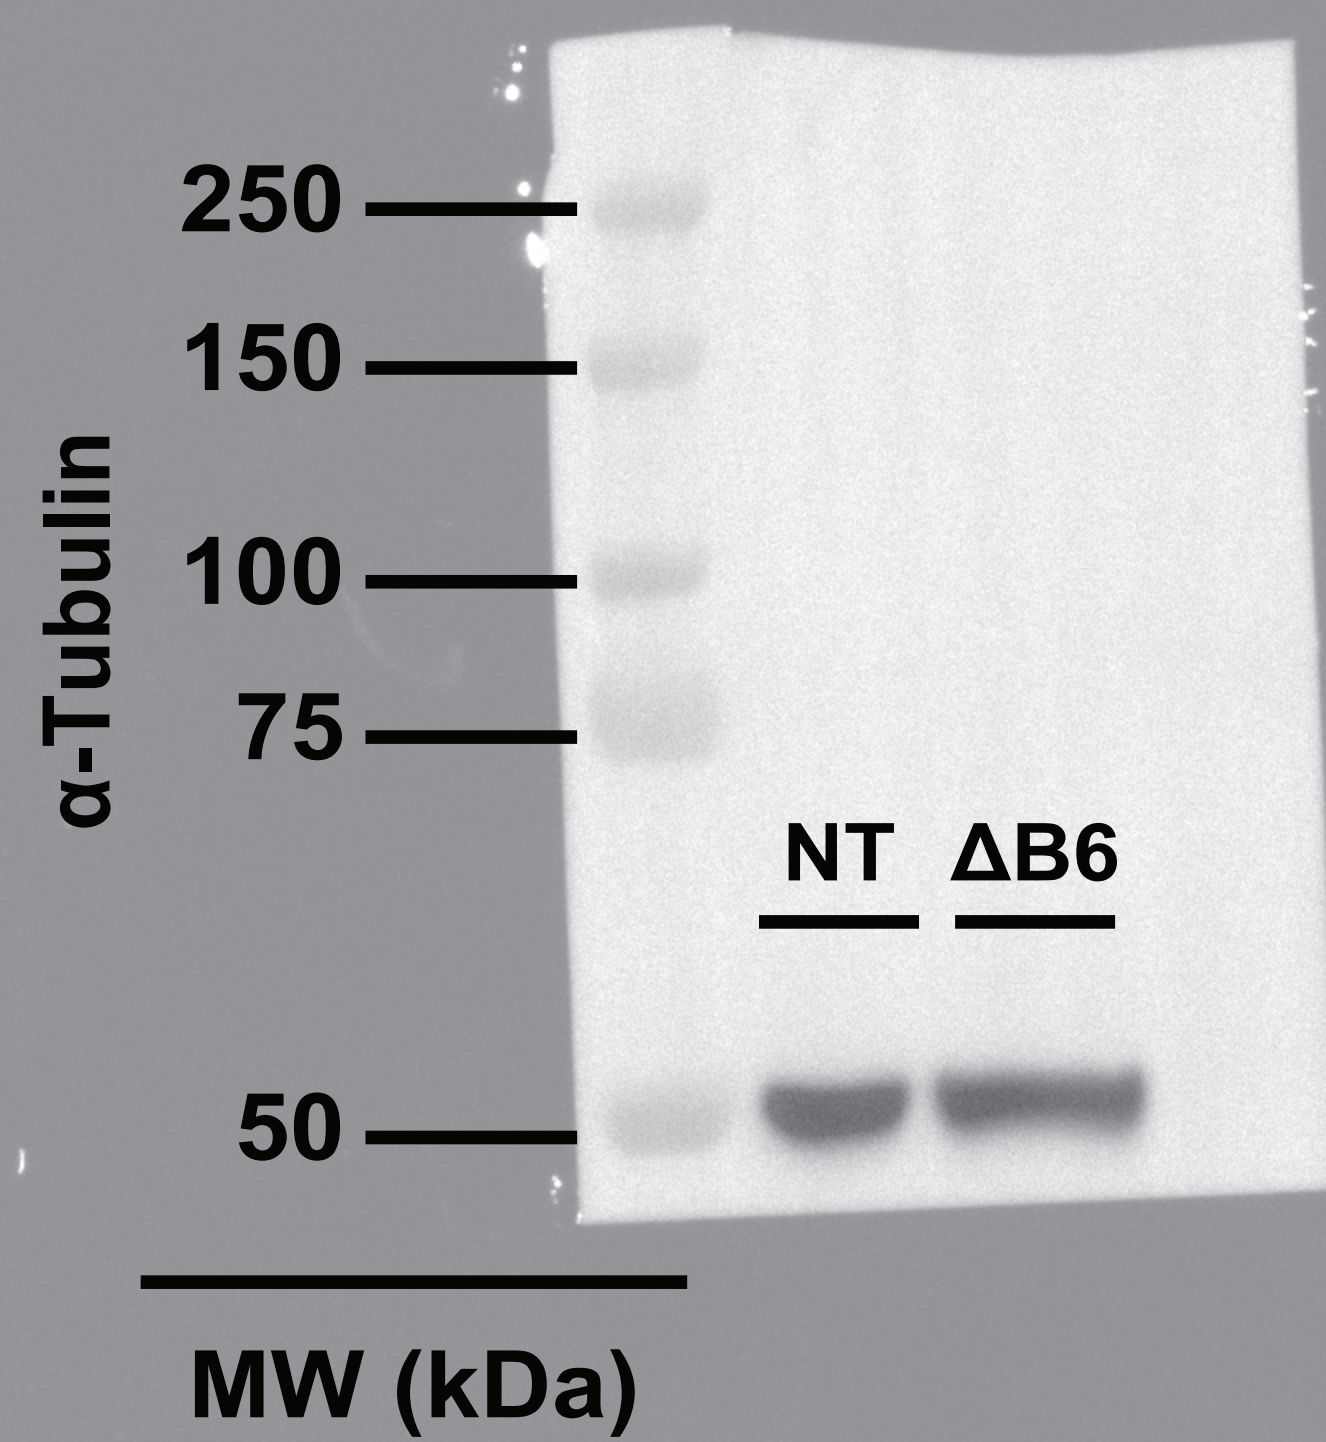

Supplement: supp [file elife-86936-supp-v1.zip]

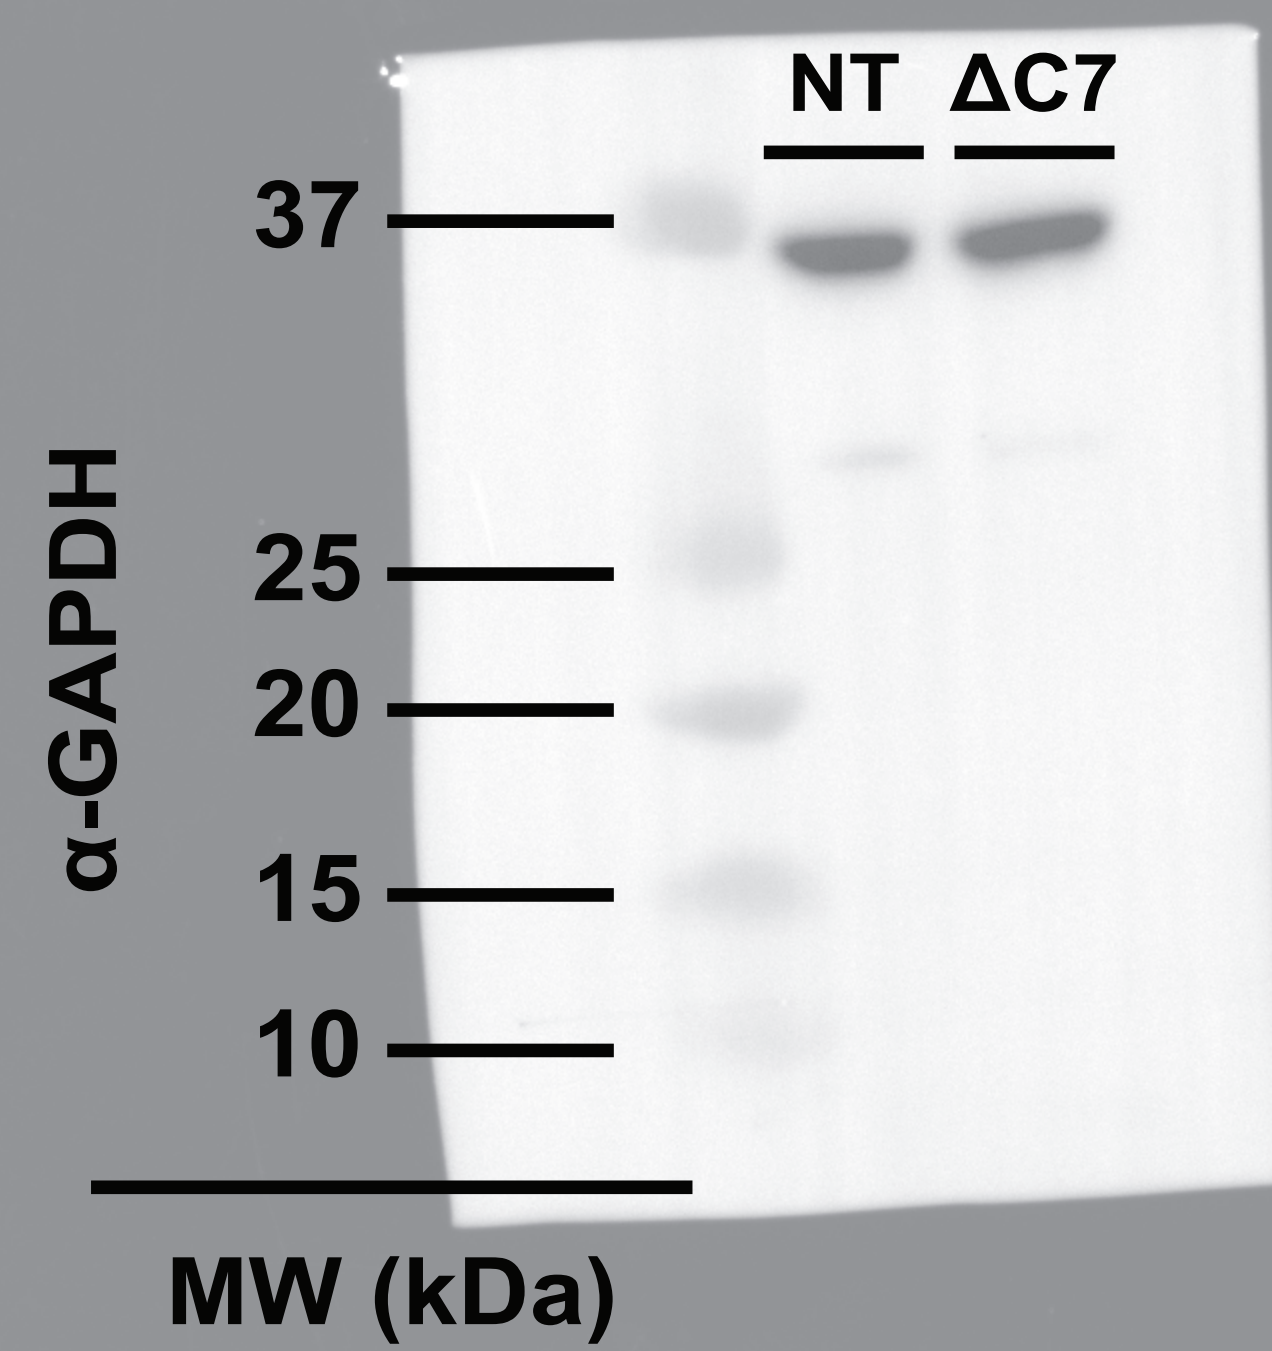

Supplement: supp [file elife-86936-supp-v1.zip]

$\alpha$ -DnaJC7

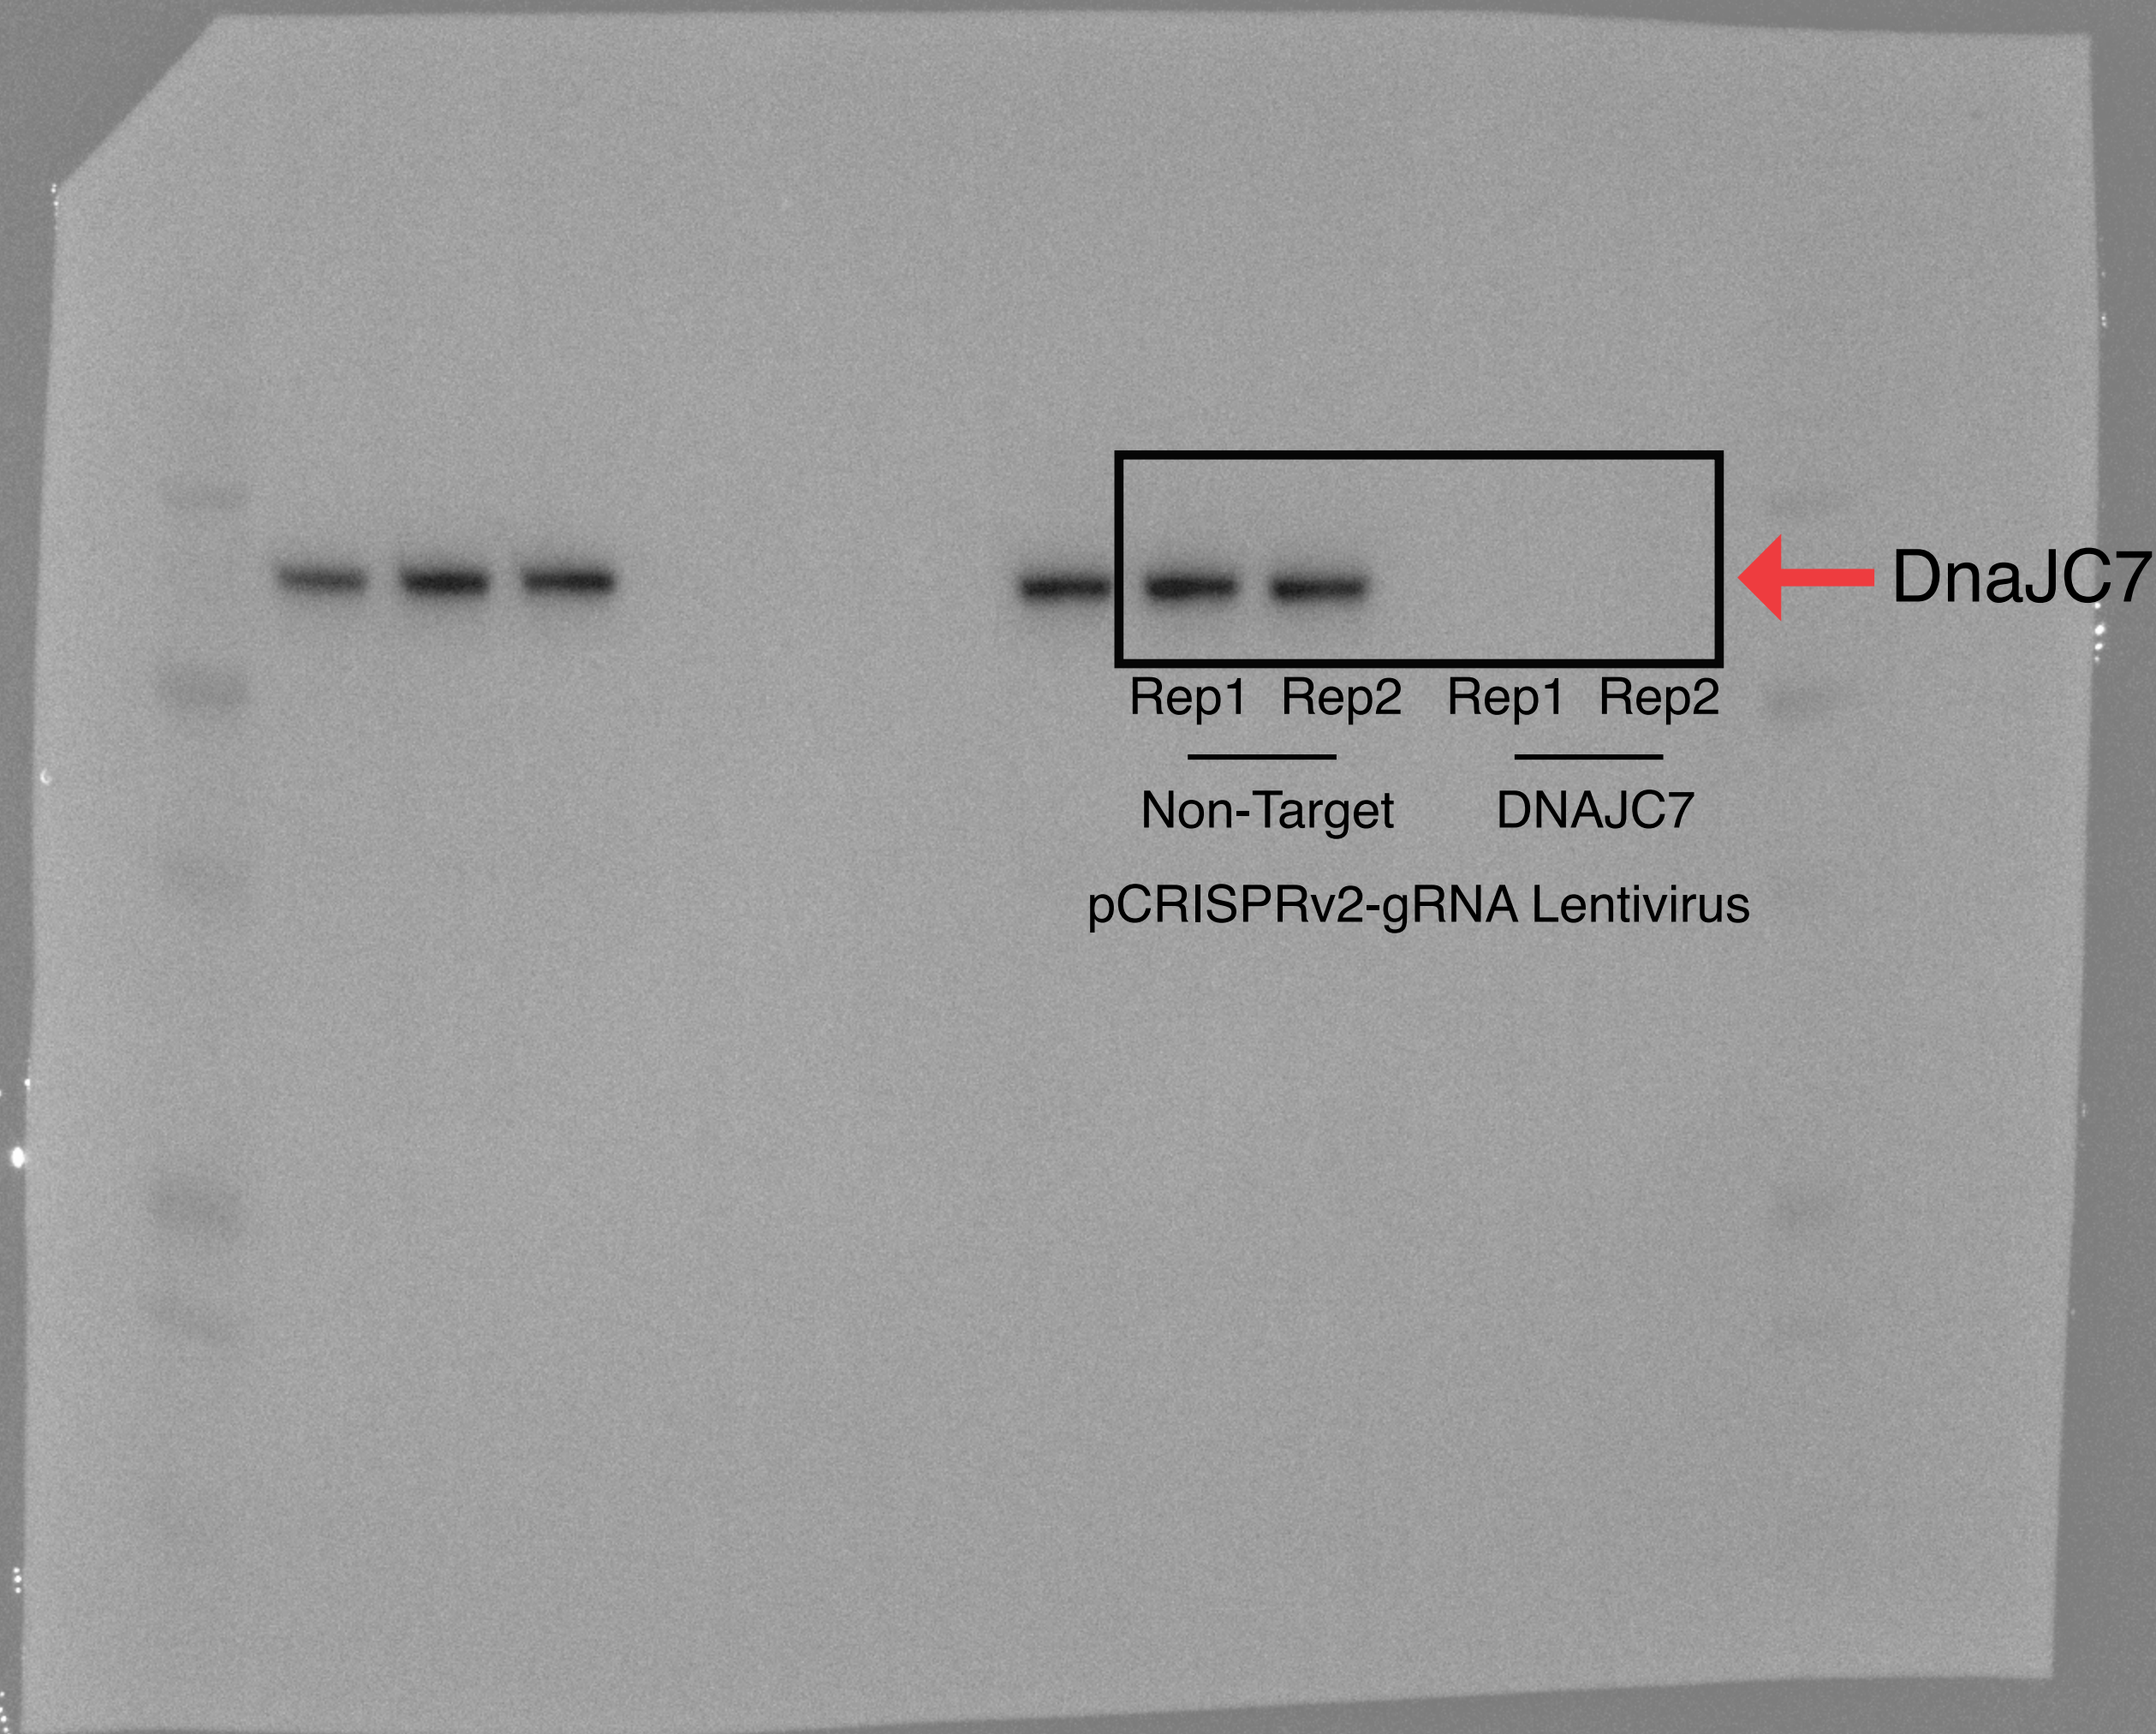

Rep1 Rep2 Rep1 Rep2  
Non-Target DNAJC7  
pCRISPRv2-gRNA Lentivirus

← DnaJC7

Supplement: supp [file elife-86936-supp-v1.zip]

## Supernatant Fraction

## Pellet Fraction

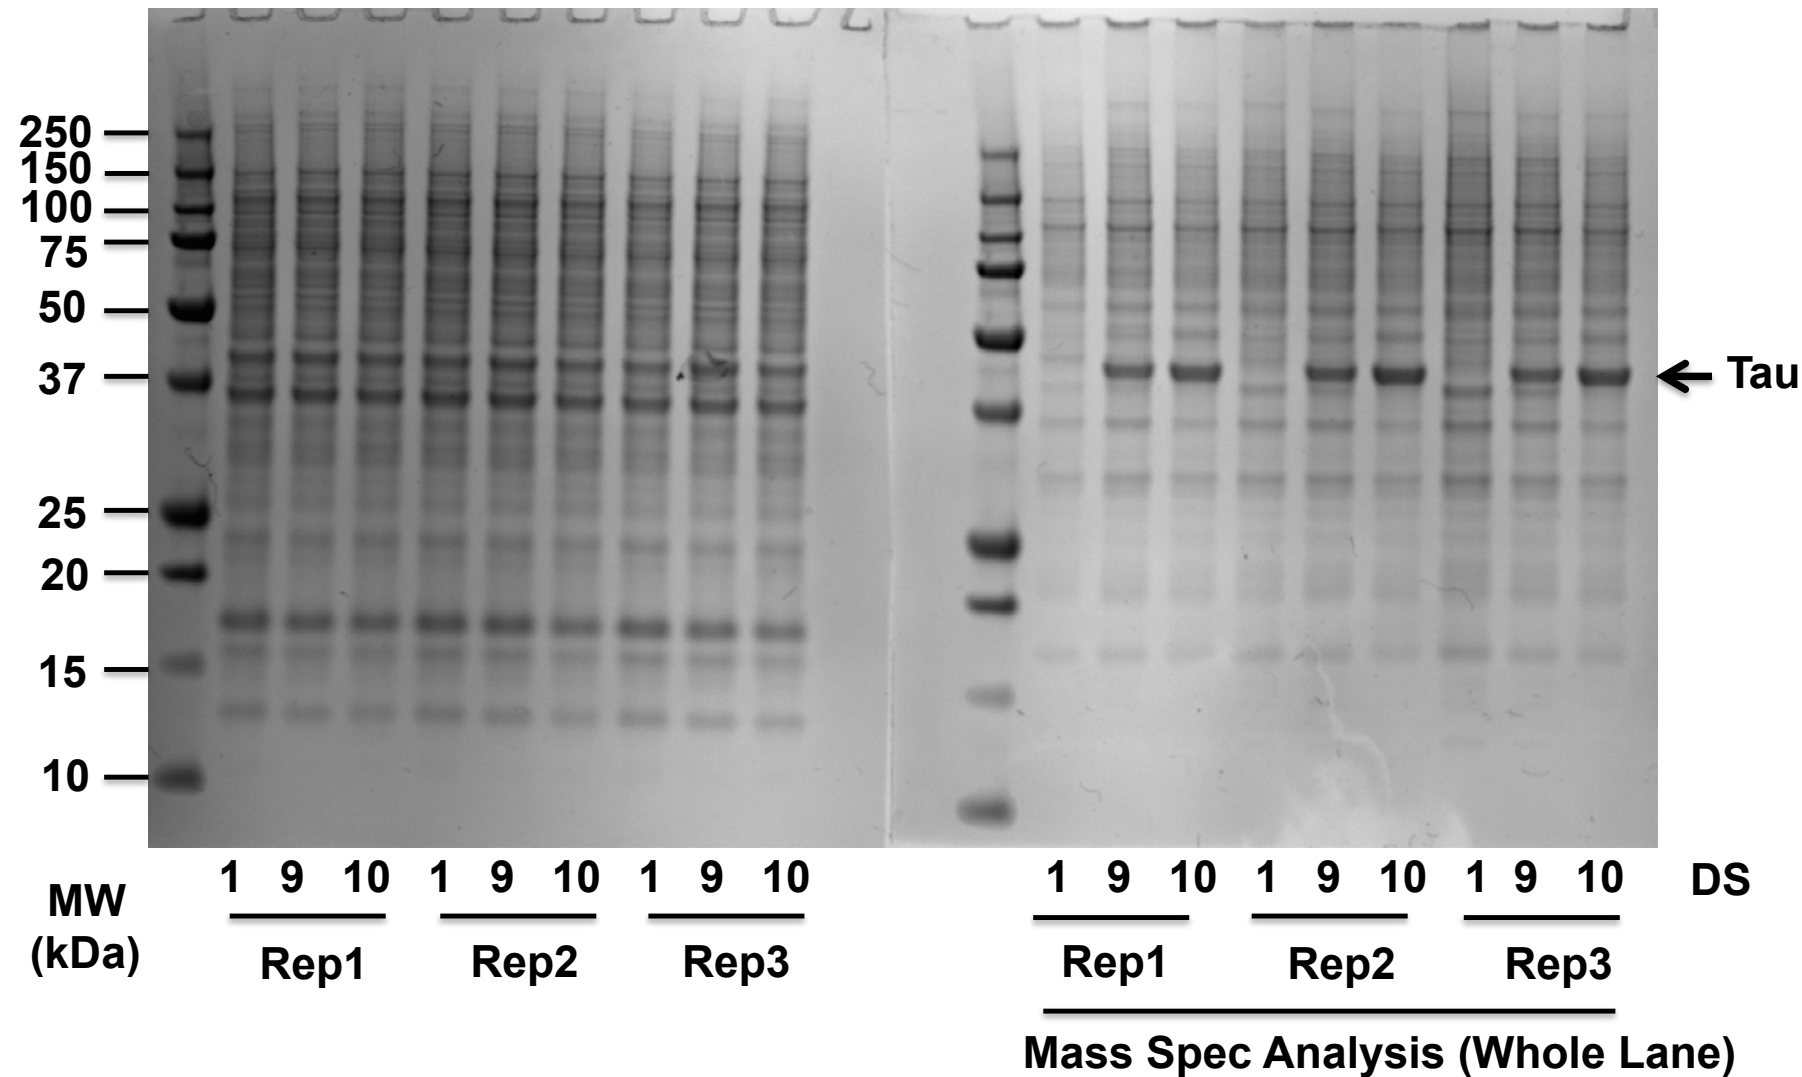

Supplement: supp [file elife-86936-supp-v1.zip]
